1 **Characterization of genomic variants associated with resistance to bedaquiline and**  
2 **delamanid in naïve *Mycobacterium tuberculosis* clinical strains**

3 Battaglia S<sup>a</sup>, Spitaleri A<sup>a,b</sup>, Cabibbe AM<sup>a</sup>, Meehan CJ<sup>c,d</sup>, Utpatel C<sup>e</sup>, Ismail N<sup>f</sup>, Tahseen S<sup>g</sup>,  
4 Skrahina A<sup>h</sup>, Alikhanova N<sup>i</sup>, Kamal SM Mostofa<sup>j</sup>, Barbova A<sup>k</sup>, Niemann S<sup>e,l</sup>, Groenheit R<sup>m</sup>,  
5 Dean AS<sup>n</sup>, Zignol M<sup>n</sup>, Rigouts L<sup>d,o</sup>, Cirillo DM<sup>a#</sup>

6 <sup>a</sup> Emerging Bacterial Pathogens Unit, Division of Immunology, Transplantation and  
7 Infectious Diseases, IRCCS San Raffaele Scientific Institute, Milan, Italy

8 <sup>b</sup> Center for Omics Sciences, IRCCS San Raffaele Scientific Institute, Milan, Italy.

9 <sup>c</sup> School of Chemistry and Biosciences, University of Bradford, Bradford, UK.

10 <sup>d</sup> Unit of Mycobacteriology, Department of Biomedical Sciences, Institute of Tropical  
11 Medicine, Antwerp, Belgium.

12 <sup>e</sup> Molecular and Experimental Mycobacteriology, Research Center Borstel, Borstel,  
13 Germany.

14 <sup>f</sup> Centre for Tuberculosis, National Institute for Communicable Diseases, National Health  
15 Laboratory Services, Johannesburg, South Africa.

16 <sup>g</sup> National TB Reference Laboratory, National Tuberculosis Control Program, Islamabad,  
17 Pakistan.

18 <sup>h</sup> Republic Research and Practical Centre for Pulmonology and Tuberculosis, Minsk,  
19 Belarus.

20 <sup>i</sup> Scientific Research Institute of Lung Diseases, Ministry of Health, Baku, Azerbaijan.

21 <sup>j</sup> National TB Reference Laboratory, National Institute of Diseases of the Chest and  
22 Hospital, Dhaka, Bangladesh.

23 <sup>k</sup> Central Reference Laboratory on Tuberculosis Microbiological Diagnostics, Ministry of  
24 Health, Kiev, Ukraine.

25 <sup>l</sup> German Center for Infection Research (DZIF), Partner Site Hamburg-Lübeck-Borstel-  
26 Riems, Germany.

27 <sup>m</sup> Unit for Laboratory Surveillance of Bacterial Pathogens, Public Health Agency of  
28 Sweden, Solna, Sweden.

29 <sup>n</sup> Global TB Programme, World Health Organization, Geneva, Switzerland.

30 <sup>o</sup> Department Biomedical Sciences, Antwerp University, Antwerp, Belgium.

31 **Running title:** Markers of resistance to bedaquiline and delamanid.

32 **#** Address correspondence to Daniela Maria Cirillo, PhD, MD: [cirillo.daniela@hsr.it](mailto:cirillo.daniela@hsr.it)

### 33 **Abstract**

34 The role of genetic mutations in genes associated to phenotypic resistance to bedaquiline  
35 (BDQ) and delamanid (DLM) in *Mycobacterium tuberculosis* complex (MTBc) strains is  
36 poorly understood. However, a clear understanding of the role of each genetic variant is  
37 crucial to guide the development of molecular-based drug susceptibility testing (DST). In  
38 this work, we analysed all mutations in candidate genomic regions associated with BDQ-  
39 and DLM-resistant phenotypes using a whole genome sequencing (WGS) dataset from a  
40 collection of 4795 MTBc clinical isolates from six high-burden countries of tuberculosis  
41 (TB). From WGS analysis, we identified 61 and 158 unique mutations in genomic regions  
42 potentially involved in BDQ- and DLM-resistant phenotypes, respectively. Importantly, all  
43 strains were isolated from patients who likely have never been exposed to the medicines.  
44 In order to characterize the role of mutations, we performed an energetic *in silico* analysis  
45 to evaluate their effect in the available protein structures Ddn (DLM), Fgd1 (DLM) and  
46 Rv0678 (BDQ), and minimum inhibitory concentration (MIC) assays on a subset of MTBc  
47 strains carrying mutations to assess their phenotypic effect. The combination of structural  
48 protein information and phenotypic data allowed for cataloging the mutations clearly  
49 associated with resistance to BDQ ( $n= 4$ ) and DLM ( $n= 35$ ), as well as about a hundred

50 genetic variants without any correlation with resistance. Importantly, these results show  
51 that both BDQ and DLM resistance-related mutations are diverse and distributed across  
52 the entire region of each gene target, which is of critical importance to the development of  
53 comprehensive molecular diagnostic tools.

## 54 **Importance**

55 Phenotypic drug susceptibility tests (DST) are too slow to provide an early indication of  
56 drug susceptibility status at the time of treatment initiation and very demanding in terms of  
57 specimens handling and biosafety. The development of molecular assays to detect  
58 resistance to bedaquiline (BDQ) and delamanid (DLM) requires accurate categorization of  
59 genetic variants according to their association with phenotypic resistance. We have  
60 evaluated a large multi-country set of clinical isolates to identify mutations associated with  
61 increased minimum inhibitory concentrations (MICs) and used an *in silico* protein structure  
62 analysis to further unravel the potential role of these mutations in drug resistance  
63 mechanisms. The results of this study are an important source of information for the  
64 development of molecular diagnostic tests to improve the provision of appropriate  
65 treatment and care to TB patients.

## 66 **1. Introduction**

67 The management of drug resistant tuberculosis (DR-TB) caused by *Mycobacterium*  
68 *tuberculosis* complex (MTBc) strains poses a serious public health challenge worldwide.  
69 The World Health Organization (WHO) new guidelines recommend the use of bedaquiline  
70 (BDQ) for all TB cases of rifampicin resistance (RR-TB), multi drug resistant (MDR) TB  
71 (MTBc strains resistant at least to isoniazid and rifampicin) and extensively drug-resistant  
72 (XDR) TB (MDR strains resistant to fluoroquinolones and second-line injectables drugs)  
73 (1). Based on WHO priority grouping of medicines, Delamanid (DLM) compound is  
74 recommended when an effective regimen cannot be established by group A agents,

75 containing BDQ, fluoroquinolones (FQs), linezolid (LZD) and B agents group, composed  
76 by clofazimine (CLF) and cycloserine (CS) (2). Previous studies have shown that  
77 MDR/XDR-TB patients treated with BDQ and DLM rapidly develop resistance due to fixed  
78 mutations in candidate genes which often appear as previously undescribed novel variants  
79 (3, 4, 5, 6, 7). Additionally, resistance to BDQ can arise in naïve populations of MTBc  
80 strains as a consequence of a clofazimine-containing regimen, or by random mutations  
81 affecting the drug targets (8, 9, 10, 11, 12, 13, 14). DLM resistance not associated to  
82 exposure has been reported as well (15, 16, 17, 18, 19). Moreover, as a member of the  
83 nitroimidazooxazines, DLM shares the same resistance mechanisms of pretomanid (PA-  
84 824) compound (20).

85 Therefore, knowledge of the BDQ and DLM susceptibility status of clinical MTBc isolates  
86 before therapy has started and the early detection of emerging resistance in failing  
87 regimens are needed to ensure an effective treatment of DR-TB.

88 Here, whole genome sequencing (WGS) based approaches, that are rapidly expanding  
89 from basic research into routine diagnostic laboratories, provide the advantage of  
90 interrogate virtually all resistance targets in a given clinical MTBc strain. However, the  
91 routine diagnostic application of WGS requires a much better understanding of the  
92 correlation between genotypic and phenotypic, particularly for the new drugs (21, 22).

93 Currently, the molecular mechanisms leading to resistance to BDQ and DLM are not well  
94 described, a fact that jeopardises the design of a reliable molecular approach to detect  
95 resistance.

96 Mutations in *atpE* (*Rv1305*), which encodes for the C-subunit of ATP synthase, have been  
97 associated with phenotypic resistance to BDQ, which is known to directly inhibit the ATP  
98 synthase (on target mechanism) (23). In addition, the mutations in the off-target *Rv0687*  
99 gene result in increased minimum inhibitory concentrations (MICs) for BDQ by up-

100 regulation of the MmpL5/MmpS5 pump gene expression, concurrently leading to a cross-  
101 resistance to clofazimine (CLF) (**10, 11, 24**). Furthermore, it has been demonstrated that  
102 mutations in *pepQ* (*Rv2535c*) may confer low-level resistance to both CLF and BDQ in  
103 clinical isolates (**9, 25**).

104 DLM impairs the biosynthesis of mycolic acids and requires activation by the F420-  
105 dependent nitroreductase encoded by the *ddn* gene (on target mechanism). The F420  
106 cofactor is synthesized by enzymes encoded by the *fbiA*, *fbiB*, *fbiC*, *fgd1* genes, all of  
107 which are involved in DLM off-target mechanisms. Polymorphisms in these genes were  
108 shown to be involved in phenotypic DLM resistance (**26, 27**).

109 To better describe BDQ and DLM resistance mechanisms, we investigated the genomic  
110 regions involved in resistance to BDQ and DLM from 4795 MTBc isolates collected within  
111 a multi-country drug-resistance surveillance study and to identify variants potentially  
112 involved in resistance development (**28**). The mutations found were correlated with strain  
113 lineage, DR-profile and country of origin. To combine the genomic data with phenotypes,  
114 we performed BDQ and DLM MICs for a subset of these isolates. Finally, for the available  
115 3D protein structures (Ddn, Fgd1 and Rv0678) we performed an *in silico* structural and  
116 energetic analysis in order to characterize and quantify the mutation effect on protein  
117 function. This combined information enabled us to provide a first robust catalogue of BDQ  
118 and DLM resistance mutations as basis of the establishment of WGS resistance prediction  
119 algorithms for these drugs.

## 120 **2. Methods**

### 121 **2.1 Study design**

122 A total of 4795 genome sequences retrieved from the Sequence Read Archive of the  
123 National Center for Biotechnology Information as recalibrated BAM files (accession  
124 number SRP128089) were considered and investigated in this study. The corresponding

125 MTBc isolates originate from a unique population-based surveillance study across six  
126 countries with a high burden of TB or MDR-TB, according to WHO's high burden country  
127 list for the period of 2016-2020: Azerbaijan ( $n = 751$ ), Belarus ( $n = 197$ ), Bangladesh  
128 ( $n = 935$ ), Pakistan ( $n = 194$ ), South Africa ( $n = 1578$ ), Ukraine ( $n = 1140$ ) (**28**). For our  
129 purposes, all sequenced isolates harbouring at least one single nucleotide polymorphism  
130 (SNP) or insertion/deletion (indel) in at least one of the candidate genomic regions for DLM  
131 and/or BDQ resistance were considered for the analysis, excluding synonymous mutations  
132 and previously characterized lineage-associated SNPs for which the absence of  
133 correlation with the phenotypic DLM resistance was demonstrated (**15, 16**). For genetic  
134 variants detected in more than one isolate we decided to replicate results selecting two  
135 isolates from different countries, whenever possible. The flowchart for sample selection,  
136 the number of isolate tested and phenotypic drug-susceptibility testing (DST) of selected  
137 isolates are reported in Figure S1 of supplementary materials.

## 138 **2.2 Whole Genome Sequencing analysis**

139 WGS data were generated by both Illumina technology (Illumina, San Diego, CA, USA)  
140 and Ion Torrent technology (ThermoFisher Scientific) as previously described (**28**).  
141 Sequencing data were analysed using the MTBseq pipeline (**29**) to identify all variants in  
142 the genomes and MTBc lineage. The analysis was performed on the mapped MTBc reads  
143 by setting a quality threshold of at least a mean coverage of 20x and an unambiguous  
144 base call threshold of  $\geq 70\%$ . A mutation was called only if SNPs and/or indel variants were  
145 detected by at least eight reads (both forward and reverse reads) with a minimum phred  
146 quality score of 20, and by considering a mutation frequency of  $\geq 75\%$ . The regions of the  
147 MTBc genome reference H37Rv NC\_000962.3 (**30**) considered in the study are reported  
148 in Table S1 of supplementary materials. The WGS analysis results and distribution of

149 mutations among lineages and countries of isolation are reported in the supplementary  
150 excel Dataset S1.

151 Cluster analysis was performed on the distance matrix generated by the MTBseq pipeline  
152 using *in-house* python scripts (<https://github.com/aspitaleri/python>). The distance matrix  
153 was analysed using a hierarchical linkage clustering method with a 12 SNPs cut-off (31).

### 154 **2.3 Minimum Inhibitory Concentration assay**

155 The selected MTBc isolates for genetic variants were sub-cultured on Löwenstein-Jensen  
156 medium and subsequently subjected to MIC testing against BDQ and/or DLM by the  
157 resazurin colorimetric microtiter plate assay (REMA) as previously described (16, 32, 33).  
158 Delamanid powder was obtained from Otsuka Pharmaceutical (Tokyo, Japan) and pure  
159 bedaquiline powder was obtained from Janssen Pharmaceutical (Beerse, Belgium). A  
160 DLM concentration range of 0.004-4 µg/ml and a BDQ concentration range of 0.004-2  
161 µg/ml were used, considering the proposed cut-off values of 0.12 µg/ml and 0.06 for BDQ  
162 and DLM, respectively (34). Based on MIC results, the isolates were categorized as  
163 susceptible (S; MIC ≤ cut-off), low resistant level (I; MIC 1 dilution > cut-off) or resistant (R;  
164 MIC more than 1 dilution > cut-off). All MIC values reported in this work correspond to the  
165 MIC<sub>100</sub> value that considers any change in colour to purple/pink as indicating the  
166 presence of viable bacilli (33). For each batch of isolates tested, the H37Rv *M.*  
167 *tuberculosis* reference strain (*M. tuberculosis* H37Rv ATCC 27294) was included as a  
168 control, and test isolate results of that batch were accepted only if the H37Rv MIC value  
169 was within the expected range of ≤0.004-0.03 µg/ml for DLM and ≤0.008-0.03 µg/ml for  
170 BDQ. Further details of REMA protocols are reported in supplementary materials Text S1  
171 word file.

### 172 **2.4 Mutation structural analysis**

173 We carried out an energetic analysis on the available crystal structures of proteins Ddn  
174 (PDB 3R5R), Fgd1 (PDB 3B4Y) and Rv0678 (PDB 4NB5) (35, 36, 37) using Eris (38) and  
175 MAESTRO (39) programs. We exploited two end-point methods to evaluate the change of  
176 protein stability upon mutations, namely Eris and MAESTRO, which calculate the folding  
177 free energy in two different manners. For this structural analysis stop codons, frameshifts,  
178 and SNPs affecting the promoter region were not included. The stability change,  $\Delta\Delta G$ , is  
179 computed as the difference between the average stabilities of mutant and wild type protein  
180 structures. Both *in silico* approaches were used as a qualitative cross-validation to  
181 evaluate the protein mutation effects, considering 0.34 Kcal/mol and 5 Kcal/mol as  
182 thresholds for MAESTRO and Eris, respectively.

183 In addition to folding stability, we calculated the effect of mutations on the complex  
184 stabilities Ddn-F420-H<sub>2</sub> Fgd1-F420-H<sub>2</sub> using DSX pair potentials knowledge-based  
185 scoring function (40). In case of Rv0678 protein we also performed an energetic analysis  
186 to quantify the effect of the mutations on the homodimer protein-protein stability. For this  
187 purpose, we carried out a molecular mechanics energies combined with the Generalized  
188 Born and surface area continuum solvation (MM/GBSA). The calculation was performed  
189 using MMPBSA.py program within Amber14 suite using ff14 force field and the GB<sup>OBC1</sup>  
190 implicit solvent model (41). All obtained *in silico* results are reported in the supplementary  
191 material Dataset S2. Further details of *in silico* analyses are reported in supplementary  
192 materials Text S1 word file. Primary protein sequences alignment for the frameshift  
193 analysis was performed using ClustalX algorithm (42). The visualization of the mapped  
194 mutations on the protein structures are created with PyMOL v2.0 (43).

### 195 **3. Results**

196 A total of 4795 WGS from MTBc clinical strains were analysed by considering the  
197 candidate genomic regions for BDQ resistance (*atpE*, *Rv0678*, *pepQ*) and for DLM



198 resistance (*ddn*, *fgd1*, *fbiA*, *fbiB*, *fbiC*). This collection included 731 (17%) MDR and 79  
199 (2%) XDR MTBc strains (Fig. S1). Based on WGS results, we identified a total of 106 and  
200 643 isolates harboring relevant genomic variants potentially involved in BDQ and DLM  
201 resistance, respectively. We tested a subset of isolates carrying mutations for phenotypic  
202 DST for BDQ ( $n=51$ ) and for DLM ( $n=124$ ) representing the 43 and 104 BDQ- and DLM-  
203 related variants, respectively (Fig. S1). All genomic variants detected by WGS analysis in  
204 candidate genes for BDQ and DLM with the corresponding information of MTBc strain  
205 lineage, drug resistance profile, country of isolation, mutation frequency and MIC results  
206 for tested MTBc isolates are reported in Dataset S1 of supplementary material.

### 207 **3.1. Analysis of mutations for BDQ resistance**

208 The WGS analysis revealed 61 unique mutations in the considered genomic regions  
209 associated with BDQ resistance (Fig. S1). The mutation analysis distribution revealed 27  
210 unique mutations in *Rv0678* (including 7 mutations in the promoter region, 16  
211 nonsynonymous mutations, and 4 indels causing frameshift mutations), 32 unique  
212 mutations in the *pepQ* gene (including 2 upstream mutations, 28 nonsynonymous  
213 mutations and 2 frameshift mutations), and 2 upstream mutations in the *atpE* gene, while  
214 no mutations were found in the *atpE* encoding region (Dataset S1).

215 Phenotypic testing revealed that four different *Rv0678* mutations had MIC values above  
216 the cut-off of 0.12  $\mu\text{g/ml}$ : two frameshift (fs) mutations in *Rv0678*, Gly6fs (del\_16-17 gg)  
217 and the double mutant Gln9fs-Thr92fs (ins\_27 c, ins\_274 a) associated with an MIC of 0.5  
218  $\mu\text{g/ml}$ , and two *Rv0678* nonsynonymous mutations Arg96Trp and Met111Lys yielding a  
219 low level of resistance to BDQ of 0.25  $\mu\text{g/ml}$  (Table 1). The two frameshift mutations  
220 associated with BDQ-resistant phenotypes were observed in one MDR isolate and another  
221 MDR isolate with concurrent resistance to FQs (corresponding to one new and one

222 previously treated TB case, respectively). Two nonsynonymous mutations associated to  
223 low level resistance were found in two pan-susceptible (full-S) MTBc strains (Table 1).  
224 The other 39 mutations were detected in isolates susceptible to BDQ with MIC values  
225  $\leq 0.12$   $\mu\text{g/ml}$ , including two isolates harbouring frameshifts in Rv0678: Ile16fs (ins\_ 46  
226 tcatggaattcg) and Ala153fs (ins\_457 c) showing an MIC of 0.06  $\mu\text{g/ml}$ . (Dataset S1). The  
227 protein amino acid sequences obtained from these two frameshifts mutations were aligned  
228 to the Rv0678 wild-type sequence, highlighting that both wild-type and mutated proteins  
229 contain the two well-conserved and important regions: the amino acid (aa) positions from  
230 34 to 99 (DNA-binding domain) and positions from 16 to 32 and from 101 to 160  
231 (dimerization domains) (Fig. 1). In the case of *Rv0678* Ile16fs, the insertion of 12  
232 nucleotides caused the addition of 4 aa from position 16 of the Rv0678 protein without  
233 disrupting the frame of the whole enzyme, while the Ala153fs caused a change to the last  
234 13 aa of the C-terminal of the protein (Fig 1). This suggests that these frameshifts do not  
235 affect protein stability and function resulting in the BDQ-susceptible phenotype.  
236 A structural analysis of the effect of mutations in Rv0678 resulting in amino acid changes  
237 was performed as previously described by the Eris and MAESTRO computational  
238 approaches (Dataset S2). The Rv0678 folding stability calculation by ERIS software  
239 showed that both Arg96Trp and Met111Lys mutations associated with the BDQ-resistant  
240 phenotype altered Rv0678 protein folding/stability ( $\Delta\Delta\text{G kcal/mol} > 5$ ). These two mutations  
241 are localized in the dsDNA-binding and dimerization domain regions of Rv0678,  
242 respectively (Fig. 2). Interestingly, the Met111Val mutation had a milder effect on the  
243 protein stability than Met111Lys which is reflected in the low BDQ MIC value. Both Eris  
244 and MAESTRO analysis showed that the other mutations in Rv0678 have a lower  
245 estimated effect on protein stability which is in accordance with lower MIC values for these  
246 clinical strains (Dataset S2). As these approaches do not consider the effect of the

247 mutations on dimerization protein function, we calculated the protein-protein binding free  
248 energy under the MM/GBSA approximation for the mutations which localize in the Rv0678  
249 dimerization domain (Fig. 2). The results showed that five mutations (Met111Lys,  
250 Leu117Arg, Val120Met, Asp141His and Met146Arg) have a significant increase of  $\Delta\Delta G$   
251 kcal/mol in the protein-protein homodimer binding free energies, indicating that they can  
252 affect the dimerization process, destabilizing the overall homodimer stability (Dataset 2).  
253 This data suggest that these mutations could be directly involved in the slight increase in  
254 BDQ MIC for these strains, all with a BDQ MIC of 0.12  $\mu\text{g/ml}$  except for the MTBc strain  
255 harboring the *Rv0678* Met146Arg variant with a BDQ MIC of 0.06  $\mu\text{g/ml}$ . (Fig. 2).

256 An analysis of correlation between observed mutations in *Rv0678*, *atpE* and *pepQ* regions  
257 with lineage and country of origin, revealed that the majority of mutations ( $n= 46$ ; 75.4%)  
258 occurred only once (Fig. 3). Only four mutations, all in *Rv0678* gene, were detected in  
259 more than 5 isolates, all of them showing a BDQ-susceptible phenotype: the a-4t mutation  
260 in the promoter region of *Rv0678* was found in 12 Beijing (2,2,1) isolates from Azerbaijan,  
261 the Val3Ile mutation in 8 LAM (4,3,4,2) isolates from Bangladesh, Asn4Thr in 6 Delhi-CAS  
262 (3) isolates from Pakistan and Gly87Arg in 8 EAI (1,1,2) isolates from Bangladesh and  
263 Pakistan (Fig. 3).

264 Looking at the BDQ-resistance associated variants, the two frameshift mutations  
265 associated with high level of BDQ MICs were both observed in isolates from Pakistan and  
266 belonged to EAI (1,1,2) and Delhi-CAS (3) lineages, while the two *Rv0678* mutations  
267 associated with low level of BDQ resistance, Arg96Trp and Met111Lys, were both  
268 observed in two isolates from Bangladesh belonging to Delhi-CAS (3) and Haarlem  
269 (4,2,1,2) lineages (Fig. 3).

### 270 **3.2. Analysis of mutations for DLM resistance**

271 The 643 MTBc isolates identified by WGS as harbouring at least one mutation in one of  
272 the candidate genes for DLM resistance represented 164 unique DLM-related mutations.  
273 The WGS analysis revealed 30 unique mutations in *ddn* (including 3 nonsense and 2  
274 frameshift mutations), 25 unique mutations in *fbiA* (including 1 nonsense mutation), 23  
275 unique mutations in *fbiB*, 65 unique mutations in *fbiC* (including 2 frameshift mutations)  
276 and 24 unique mutations in *fgd1* gene (Dataset S1).

277 Considering all unique mutations, twenty (12.2%) were combinations of two or three  
278 variants in more than one candidate gene. Phenotypic results revealed that out of the 124  
279 isolates tested for DLM, 26 (21%) were resistant to DLM, 13 (10.5%) showed a low level of  
280 resistance (MIC = 0.12 µg/ml), while 85 (68.5%) were DLM susceptible (Dataset S1). The  
281 DLM-resistant isolates spanned 32 different mutations (Table 2). Considering the  
282 phenotypic drug resistance profiles of the DLM-resistant isolates, only six were MDR-TB  
283 strains, five of which were retreatment TB cases and one was a new TB case. The  
284 analysis of mutation types associated with DLM-resistant revealed 3 nonsense mutations  
285 leading to truncated proteins, 3 frameshift mutations and 26 nonsynonymous mutations  
286 leading to a single amino acid change (Table 2).

287 Overall, the MIC levels among DLM-resistant isolates ranged from 0.12 µg/ml to ≥4 µg/ml,  
288 with the highest MIC values occurring with mutation types causing a truncated Ddn or FbiA  
289 protein (frameshift or stop codon mutations). The remaining mutations were associated  
290 with increased DLM MIC values between 0.12 and 0.5 µg/ml. Opposite to the high MIC  
291 level (≥4 µg/ml) observed for the frameshift at codon 14 in the *ddn* gene, the observed  
292 frameshift at the very end of the *fbiC* gene (codon 855) caused a lower increase in MIC  
293 level at 0.5 µg/ml (Table 2).

294 Similar to Rv0678, the mutation structural analysis was performed for the Ddn (PDB 3R5L;  
295 3R5R) and Fgd1 (PDB 3B4Y; 3C8N) proteins (Dataset S2). The highly conserved Ddn

296 protein catalyzes the reduction of nitroimidazoles of DLM prodrug by the co-factor F420-  
297 H<sub>2</sub>, resulting in intracellular release of lethal reactive nitrogen species (36). For the on-  
298 target Ddn protein, mutations Asn91Thr and Pro86Thr localize very close to the cofactor  
299 binding site (Fig 4A) and  $\Delta$ DSX energies resulted from DrugScore analysis indicate that  
300 these are the only two mutations which reduce binding affinity between Ddn and the  
301 cofactor F420-H<sub>2</sub> (Dataset S2). The Ddn mutation Thr140Ile is far from the cofactor  
302 binding site but its effect on MIC increase is due to the protein folding stability, because  
303 the side chain of Thr140 residue is involved in the hydrogen bond network with Ala82-  
304 Lys79-F420-H<sub>2</sub> (Fig. 4A). The mutation Val61Gly, which has a mild effect on the MIC (0.12  
305  $\mu$ g/ml), showed high levels of  $\Delta\Delta$ G Kcal/mol with both the Eris and MAESTRO analyses,  
306 suggesting a role in destabilizing the folding protein in the  $\beta$ -sheet (Fig. 4A). The analysis  
307 of point mutations in Ddn without available MIC values revealed a high level of  $\Delta\Delta$ G  
308 Kcal/mol energy for mutations Arg72Gln, Pro86Thr and Glu150Ala, suggesting their  
309 potential involvement on Ddn stability and consequently phenotypic DLM resistance  
310 (Dataset S2).

311 The DLM off-target F420-dependent glucose-6-phosphate dehydrogenase (Fgd1) is  
312 important in MTBc energy metabolism, and it is implicated in DLM redox processes related  
313 to non-replicating persistence by providing the reduced co-factor F420-H<sub>2</sub> (35). The  
314 reported MIC values did not show a strong effect in the *in vitro* experiments because all  
315 identified mutations are further than 10 Å from the co-factor F420 binding site (Fig. 4B).  
316 Moreover, the computational Eris approach predicts that two Fgd1 mutations without  
317 phenotypic data, Ala27Gly and Val165Leu, have potential roles in protein destabilization  
318 (Dataset S2). The Fgd1 mutation Gly314Glu which was observed in a strain with only a  
319 moderate increase of DLM MIC level seemed to poorly correlate with DLM phenotype,

320 suggesting that other factors could contribute to this small variation of the DLM MIC level  
321 in MTBc strains.

322 The distribution analysis of mutations across genotypes and country of isolation showed  
323 that *ddn* mutations involved in a DLM-resistant phenotype are represented only once or  
324 twice. Exception are, Pro2Gln which was found in seven mainly-T (4,8) isolates (all from  
325 Azerbaijan), Asn91Thr in *ddn* in combination with mutation Val58Ile in *fbiA* in three mainly-  
326 T (4,8) isolates (two from Azerbaijan and one from Ukraine), and the high-level resistant  
327 stop codon mutation Gln58STOP which was detected in three Beijing (2,2,1) isolates from  
328 Ukraine (Fig. 5A). Two DLM-resistant mutations in the *fbiA-fbiB* region were seen in a  
329 single isolate, while the *fbiB* mutation Asp224Asn was found in two Delhi-CAS (3) isolates  
330 from Bangladesh. Mutation type Ile208Val in *fbiA* was the most prevalent and seen in 22  
331 isolates, all belonging to the Euro-American lineage (Clade1; 4,1,2) and isolated in South  
332 Africa ( $n= 19$ ), Bangladesh ( $n= 2$ ) and Ukraine ( $n= 1$ ) (Fig. 5B). Four of the seven DLM-  
333 resistant *fbiC* mutation types were seen in single isolates, one was observed in two  
334 isolates while two were more prevalent: the frameshift mutation Ala855fs (a deletion of 62  
335 nt) which was detected in 30 isolates from South Africa belonging to eight different  
336 lineages, and mutation Ala835Val detected in 18 EAI (1,1,3) isolates from Bangladesh only  
337 (Fig. 6). Of note, most of the DLM-resistant strains with high-level of DLM MIC were  
338 isolated in Bangladesh (75%) and mutations were detected in *ddn* (46%), *fbiC* (31%), *fbiA*  
339 (15%) and *fbiB* (8%) (Dataset S1).

340 Cluster analysis by distance matrix was also performed in order to understand if the  
341 observation of three or more isolates with mutations associated with DLM resistance were  
342 potential clonal clusters. Results showed that the three Beijing (2,2,1) isolates harbouring  
343 the stop codon mutation Gln58STOP in *ddn* gene were part of the same transmission  
344 chain, at 12 SNPs cut-off (Fig. S2). Moreover, ten other clusters of two isolates each were

345 identified in all the other groups harbouring mutation associated with DLM resistance: four  
346 clusters of isolates with the Ile208Val mutation in *fbiA*, one cluster of isolates with Ala855fs  
347 variant in *fbiC*, two clusters of isolates with Pro2Gln in *ddn*, one cluster of isolates with  
348 Asn91Thr and Val58Ile mutations in *ddn* and *fbiA* respectively, and two clusters of isolates  
349 with *fbiC* Ala835Val (Fig. S2).

#### 350 **4. Discussion and Conclusion**

351 Bedaquiline (BDQ) and delamanid (DLM) have expanded available treatment options and  
352 improved treatment success rates for patients with pulmonary MDR-TB and XDR-TB (**44**,  
353 **45**, **46**, **47**), including children with MDR-TB (**48**, **49**). The detection of resistance to BDQ  
354 and DLM is critical to ensuring effective treatment and care for DR-TB patients and  
355 preventing ongoing transmission. Although evidence for the validation and standardization  
356 of efficient methods for MICs and the setting of breakpoints for BDQ and DLM continues to  
357 expand (**22**, **34**, **50**, **51**), there is still a notable lack of suitable data on resistance-related  
358 genomic variants (**52**). Moreover, phenotypic methods are too slow to provide early  
359 indication of susceptibility status at the time of treatment initiation. An accurate  
360 classification of SNPs according to their association with drug resistance is therefore  
361 essential to allow the use of WGS to guide the composition of treatment regimens (**7**, **53**).  
362 The fact that accurate databases with catalogued mutations are currently lacking for these  
363 drugs, represent a serious limitation for molecular DST for BDQ and DLM.

364 To tackle this, we used a unique dataset containing 4795 WGS data of MTBc isolates from  
365 different countries with either a higher burden of TB or MDR-TB (Azerbaijan, Bangladesh,  
366 Belarus, South Africa, Pakistan and Ukraine) as a unique and accurate source of genetic  
367 information for the characterization and validation of genomic variants potentially involved  
368 in BDQ and DLM resistance. In particular, this study highlighted the role of genetic variants  
369 for BDQ and DLM resistance development by combining the MICs results of MTBc isolates

370 with variants and the *in silico* analysis on available protein structures, paving the way for  
371 the construction of an encyclopaedia of characterized mutations to be use for molecular  
372 DST.

373 From the whole WGS dataset, we identified 61 different BDQ-related variants in *Rv0678*,  
374 *atpE* promoter and *pepQ* genomic regions, out of which four were associated to BDQ-  
375 resistant phenotype: two frameshift mutations in *Rv0678* associated to a high levels of  
376 BDQ MIC and two non-synonymous mutations found associated to low levels of BDQ  
377 resistance. To the best of our knowledge, among these four BDQ-resistant mutations, only  
378 the frameshift mutation Gly6fs (del\_16-17 gg) has been previously described in one BDQ-  
379 resistant isolate (**54**). In agreement with the *in vitro* MIC experiments, the *in silico* structural  
380 analysis on the *Rv0678* single monomer protein form (PDB 4N5B) showed that mutations  
381 Met111Lys and Arg96Trp have very high Eris and MAESTRO  $\Delta\Delta G$  Kcal/mol energy  
382 values, indicating a strong destabilization of the protein folding. The mutations Gly87Arg  
383 and Leu117Arg in *Rv0678* were previously described in BDQ-susceptible strains (**13**),  
384 confirming the detected low MIC of 0.03  $\mu\text{g/ml}$  and 0.12  $\mu\text{g/ml}$ , respectively. (Dataset S1).  
385 The role of Leu117Arg remains unclear as another study described this mutation as  
386 associated with both BDQ and also CLF resistance (**11**). However, our phenotypic and *in*  
387 *silico* results suggest that Leu117Arg affects the dimerization of *Rv0678* causing a small  
388 increase but not high-level value of BDQ MIC. Other mutations in *Rv0678* were described  
389 at the same codon position but with a different amino acid change (**5, 8, 9, 11, 13**). The  
390 *Rv0678* mutations Val20Phe, Ala84Glu and Arg90Pro were observed to be linked to  
391 increase MICs for CLF and potentially associated to a BDQ-resistant phenotype, while  
392 Val20Gly was associated with both BDQ and CLF resistance (**5, 9**). In this study, *Rv0678*  
393 mutations Val20Ala and Ala84Val were found in BDQ-susceptible strains (MIC  $\leq$  0.008  
394  $\mu\text{g/ml}$ ), while Arg90Cys was associated with a BDQ MIC value of 0.12  $\mu\text{g/ml}$ . Moreover, *in*



395 *silico* analysis confirmed that the Arg90Cys mutation can have a mild effect on protein  
396 stability and a role in the small variation of BDQ MIC. Mutations Arg96Gln, Met146Thr and  
397 Leu136Pro in *Rv0678* have been described with increased MIC values for BDQ (**8**, **11**,  
398 **13**). In our dataset, strains harbouring mutations at the same codons were not consistently  
399 phenotypically resistant, with mutations Arg96Trp, Met146Arg and Leu136Val respectively  
400 showing MICs of 0.25 µg/ml (BDQ-resistant), 0.06 µg/ml (BDQ-susceptible) and 0.03  
401 µg/ml (BDQ-susceptible). Again, *in silico* analysis results were in agreement with the  
402 phenotypic data, showing that only the Arg96Trp mutation highly destabilized *Rv0678*  
403 folding while the other two mutations showed a lower  $\Delta\Delta G$  Kcal/mol energy values  
404 (Dataset S2). Furthermore, the *in silico* MM/GBSA analysis, revealed that *Rv0678*  
405 mutations Leu117Arg, Val120Met and Asp141His can affect the protein homodimerization,  
406 which could explain the slight increase of BDQ MIC to 0.12 µg/ml for these MTBc strains,  
407 yet still classified as BDQ-susceptible despite being close to the proposed cut-off.

408 Considering the five genomic regions associated with DLM phenotype (*ddn*, *fgd1*, *fbiA*,  
409 *fbiB* and *fbiC*), the WGS analysis revealed a total of 164 unique mutations potentially  
410 involved in DLM resistance. Apart from seven previously characterized mutations (**16**), all  
411 the other 156 DLM-related variants have not been previously described earlier except for  
412 Asn91Thr in *ddn*, for which we confirmed its role in DLM resistance (**18**). Phenotypic  
413 results on a subset of available isolates showed that 32 different mutations, detected in all  
414 of the considered genomic regions were associated to DLM resistance. Notably, the *in*  
415 *silico* mutation structural analysis revealed that the effect of the point mutations in *Ddn* and  
416 *Fgd1* were in agreement with the MIC results (Dataset S2). Indeed, the mutation Asn91Thr  
417 in *Ddn* is directly involved in the binding with the co-factor F420-H<sub>2</sub> by disrupting the *Ddn*-  
418 F420-H<sub>2</sub> interaction but also in destabilizing the *Ddn* folding and mutations Val61Gly and  
419 Thr140Ile, which were observed in MTBc strains with MICs for DLM of 0.12 µg/ml and 0.5

420 µg/ml respectively, showed also a potential effect on Ddn protein folding and stability.  
421 Furthermore, the *in silico* analysis indicates that three mutations in Ddn for which  
422 corresponding phenotypic data were not available (Arg72Gln, Pro86Thr, Glu150Ala) may  
423 have a significant impact on protein stability and thereby play a role in the DLM-resistant  
424 phenotype.

425 In addition, the correlation analysis between mutations linked to BDQ- and DLM-resistant  
426 phenotypes and metadata information corroborate with previously reported data,  
427 suggesting the absence of links between BDQ or DLM resistance and strain lineage or  
428 drug resistance profiles of MTBc isolates (**10, 16**). Globally, considering DST profiles of  
429 BDQ- and DLM-resistant strains, 75% were fully susceptible, 6% were MDR-TB, and the  
430 majority of them (68.7%) was from new TB cases. Moreover, the analysis of country-  
431 lineage distribution did not reveal any significant correlation between BDQ/DLM-related  
432 mutations and lineage groups or country of isolation. To complete this set of analyses, we  
433 also performed a SNP-based distance matrix to evaluate the relatedness of strains  
434 harbouring the most frequent DLM-resistant variants, showing that for these groups there  
435 are no major transmission chains but only small clusters of two to three isolates, meaning  
436 that these resistance-associated mutations can rise spontaneously and independently.  
437 Conversely, none of the BDQ-resistant variants were detected in isolates groups.

438 In conclusion, our study provides novel and important evidence on the role of mutations  
439 associated with BDQ- and DLM-resistant phenotypes. A concerning high prevalence of  
440 genetic mutations associated with an increased MIC was detected in clinical isolates from  
441 patients who have never been exposed to these drugs, supporting previous findings (**10,**  
442 **16**). Also, our data showed that different non-synonymous or indel mutation at the same  
443 nucleotide position can display a completely different phenotypic effect or different level of  
444 resistance, thus reinforcing the need to accurately investigate the role of each individual

445 mutation. Equally important, these findings also showed the presence of 125 genetic  
446 variants not associated with BDQ and DLM resistance, scattered over the full length of  
447 each target gene. Therefore, considering the complexity of BDQ and DLM mechanisms of  
448 resistance and the absence of fully standardized phenotypic tests, the development of  
449 accurate molecular-based DST is wholly dependent on the establishment of a complete  
450 database of validated mutations, a scenario which is comparable to the challenges  
451 associated with molecular markers of resistance to pyrazinamide (PZA) (55). The  
452 establishment of a common database combining data from MTBc isolates collected in a  
453 large number of settings with the inclusion of different parameters (phenotype, genotype,  
454 structure, and free energy analyses) is fundamental to improve our understanding of the  
455 role of mutations in determining the BDQ/DLM susceptibility phenotype. Finally, this  
456 database could be also beneficial to study genetic resistance to other drugs that could be  
457 potentially sharing similar genetic basis of resistance such as clofazimine for BDQ and  
458 pretomanid for DLM.

459 For these reasons, despite some limitations (not all strains were available for MIC  
460 determination, absence of standardized methods and breakpoints for the interpretation of  
461 BDQ and DLM phenotypes, absence of 3D structures of FbiA, FbiB, FbiC and PepQ  
462 proteins for *in silico* investigation, lack of knowledge of other genomic regions potentially  
463 involved in BDQ/DLM resistance), this work will be an important source of information for  
464 new genome-based sequencing approaches for predicting BDQ and DLM resistance.

## 465 **References**

- 466 1. World Health Organization. 2019. Global Tuberculosis Report, 2019. WHO,  
467 Geneva. [https://www.who.int/tb/publications/global\\_report/en/](https://www.who.int/tb/publications/global_report/en/)
- 468 2. World Health Organization. 2019. Consolidated guidelines on drug-resistant  
469 tuberculosis treatment. WHO, Geneva.

- 470 [https://www.who.int/tb/publications/2019/consolidated-guidelines-drug-resistant-TB-](https://www.who.int/tb/publications/2019/consolidated-guidelines-drug-resistant-TB-treatment/en/)  
471 [treatment/en/](https://www.who.int/tb/publications/2019/consolidated-guidelines-drug-resistant-TB-treatment/en/)
- 472 3. Bloemberg GV, Keller PM, Stucki D, Trauner A, Borrell S, Latshang T, Coscolla M,  
473 Rothe T, Hömke R, Ritter C, Feldmann J, Schulthess B, Gagneux S, Böttger EC.  
474 2015. Acquired Resistance to Bedaquiline and Delamanid in Therapy for  
475 Tuberculosis. *N Engl J Med* **12**:1986-1988. doi: [10.1056/NEJMc1505196](https://doi.org/10.1056/NEJMc1505196)
- 476 4. Hoffmann H, Kohl T, Hofmann-Thiel S, Merker M, Beckert P, Jatou K, Nedialkova L,  
477 Sahalchik E, Rothe T, Keller PM, Niemann S. 2016. Delamanid and Bedaquiline  
478 Resistance in *Mycobacterium tuberculosis* Ancestral Beijing Genotype Causing  
479 Extensively Drug-Resistant Tuberculosis in a Tibetan Refugee. *Am J Respir Crit*  
480 *Care Med* **193**:337-340. doi: [10.1164/rccm.201502-0372LE](https://doi.org/10.1164/rccm.201502-0372LE)
- 481 5. Ghodousi A, Rizvi AH, Baloch AQ, Ghafoor A, Khanzada FM, Qadir M, Borroni E,  
482 Trovato A, Tahseen S, Cirillo DM. 2019. Acquisition of Cross-Resistance to  
483 Bedaquiline and Clofazimine following Treatment for Tuberculosis in Pakistan.  
484 *Antimicrob Agents Chemother* **63**:e00915-19. doi: [10.1128/AAC.00915-19](https://doi.org/10.1128/AAC.00915-19)
- 485 6. Polsfuss S, Hofmann-Thiel S, Merker M, Krieger D, Niemann S, Rüssmann H,  
486 Schönfeld N, Hoffmann H, Kranzer K. 2019. Emergence of Low-level Delamanid  
487 and Bedaquiline Resistance During Extremely Drug-resistant Tuberculosis  
488 Treatment. *Clin Infect Dis* **69**:1229-1231. doi: [10.1093/cid/ciz074](https://doi.org/10.1093/cid/ciz074)
- 489 7. Andres S, Merker M, Heyckendorf J, Kalsdorf B, Rumetshofer R, Indra A, Hofmann-  
490 Thiel S, Hoffmann H, Lange C, Niemann S, Maurer FP. 2020. Bedaquiline-resistant  
491 Tuberculosis: Dark Clouds on the Horizon. *Am J Respir Crit Care Med Online*  
492 ahead of print. doi: [10.1164/rccm.201909-1819LE](https://doi.org/10.1164/rccm.201909-1819LE)
- 493 8. Torrea G, Coeck N, Desmaretz C, Van De Parre T, Van Poucke T, Lounis N, de  
494 Jong BC, Rigouts L. 2015. Bedaquiline susceptibility testing of *Mycobacterium*

- 495           *tuberculosis* in an automated liquid culture system. *J Antimicrob Chemother*  
496           **70**:2300-2305. doi: [10.1093/jac/dkv117](https://doi.org/10.1093/jac/dkv117)
- 497       9. Zhang S, Chen J, Cui P, Shi W, Zhang W, Zhang Y. 2015. Identification of novel  
498           mutations associated with clofazimine resistance in *Mycobacterium tuberculosis*. *J*  
499           *Antimicrob Chemother* **70**:2507-2510. doi: [10.1093/jac/dkv150](https://doi.org/10.1093/jac/dkv150)
- 500       10. Villellas C, Coeck N, Meehan CJ, Lounis N, de Jong B, Rigouts L, Andries K. 2017.  
501           Unexpected high prevalence of resistance-associated Rv0678 variants in MDR-TB  
502           patients without documented prior use of clofazimine or bedaquiline. *J Antimicrob*  
503           *Chemother* **72**:684-690. doi: [10.1093/jac/dkw502](https://doi.org/10.1093/jac/dkw502)
- 504       11. Xu J, Wang B, Hu M, Huo F, Guo S, Jing W, Nuermberger E, Lu Y. 2017. Primary  
505           Clofazimine and Bedaquiline Resistance among Isolates from Patients with  
506           Multidrug-Resistant Tuberculosis. *Antimicrob Agents Chemother* **61**:e00239-17. doi:  
507           [10.1128/AAC.00239-17](https://doi.org/10.1128/AAC.00239-17)
- 508       12. Ismail NA, Omar SV, Joseph L, Govender N, Blows L, Ismail F, Koornhof H, Dreyer  
509           AW, Kaniga K, Ndjeka N. 2018. Defining Bedaquiline Susceptibility, Resistance,  
510           Cross-Resistance and Associated Genetic Determinants: A Retrospective Cohort  
511           Study. *EBioMedicine* **28**:136-142. doi: [10.1016/j.ebiom.2018.01.005](https://doi.org/10.1016/j.ebiom.2018.01.005)
- 512       13. Martinez E, Hennessy D, Jelfs P, Crighton T, Chen SC, Sintchenko V. 2018.  
513           Mutations associated with in vitro resistance to bedaquiline in *Mycobacterium*  
514           *tuberculosis* isolates in Australia. *Tuberculosis (Edinb)* **111**:31-34. doi:  
515           [10.1016/j.tube.2018.04.007](https://doi.org/10.1016/j.tube.2018.04.007)
- 516       14. Kardan-Yamchi J, Kazemian H, Battaglia S, Abtahi H, Foroushani AR, Hamzelou G,  
517           Cirillo DM, Ghodousi A, Feizabadi MM. 2020. Whole Genome Sequencing Results  
518           Associated with Minimum Inhibitory Concentrations of 14 Anti-Tuberculosis Drugs

- 519 among Rifampicin-Resistant Isolates of *Mycobacterium tuberculosis* from Iran. *J*  
520 *Clin Med* **9**:E465. doi: [10.3390/jcm9020465](https://doi.org/10.3390/jcm9020465)
- 521 15. Feuerriegel S, Köser CU, Baù D, Rüsç-Gerdes S, Summers DK, Archer JA, Marti-  
522 Renom MA, Niemann S. 2011. Impact of Fgd1 and ddn diversity in *Mycobacterium*  
523 *tuberculosis* complex on in vitro susceptibility to PA-824. *Antimicrob Agents*  
524 *Chemother* **55**:5718–5722. doi: [10.1128/AAC.05500-11](https://doi.org/10.1128/AAC.05500-11)
- 525 16. Schena E, Nedialkova L, Borroni E, Battaglia S, Cabibbe AM, Niemann S, Utpatel  
526 C, Merker M, Trovato A, Hofmann-Thiel S, Hoffmann H, Cirillo DM. 2016.  
527 Delamanid susceptibility testing of *Mycobacterium tuberculosis* using the resazurin  
528 microtitre assay and the BACTEC™ MGIT™ 960 system. *J Antimicrob Chemother*  
529 **71**:1532-1539. doi: [10.1093/jac/dkw044](https://doi.org/10.1093/jac/dkw044)
- 530 17. Pang Y, Zong Z, Huo F, Jing W, Ma Y, Dong L, Li Y, Zhao L, Fu Y, Huang H. 2017.  
531 In Vitro Drug Susceptibility of Bedaquiline, Delamanid, Linezolid, Clofazimine,  
532 Moxifloxacin, and Gatifloxacin against Extensively Drug-Resistant Tuberculosis in  
533 Beijing, China. *Antimicrob Agents Chemother* **61**:e00900-17. doi:  
534 [10.1128/AAC.00900-17](https://doi.org/10.1128/AAC.00900-17)
- 535 18. Fujiwara M, Kawasaki M, Hariguchi N, Liu Y, Matsumoto M. 2018. Mechanisms of  
536 resistance to delamanid, a drug for *Mycobacterium tuberculosis*. *Tuberculosis*  
537 (*Edinb*) **108**:186-194. doi: [10.1016/j.tube.2017.12.006](https://doi.org/10.1016/j.tube.2017.12.006)
- 538 19. Yang JS, Kim KJ, Choi H, Lee SH. 2018. Delamanid, Bedaquiline and Linezolid  
539 Minimum Inhibitory Concentration Distributions and Resistance-related Gene  
540 Mutations in Multidrug-resistant and Extensively Drug-resistant Tuberculosis in  
541 Korea. *Ann Lab Med* **38**:563-568. doi: [10.3343/alm.2018.38.6.563](https://doi.org/10.3343/alm.2018.38.6.563)
- 542 20. Wen S, Jing W, Zhang T, Zong Z, Xue Y, Shang Y, Wang F, Huang H, Chu N, Pang  
543 Y. 2019. Comparison of in vitro activity of the nitroimidazoles delamanid and

- 544 pretomanid against multidrug-resistant and extensively drug-resistant tuberculosis.  
545 *Eur J Clin Microbiol Infect Dis* **38**:1293-1296. doi: [10.1007/s10096-019-03551-w](https://doi.org/10.1007/s10096-019-03551-w)
- 546 21. Ellington MJ, Ekelund O, Aarestrup FM, Canton R, Doumith M, Giske C, Grundman  
547 H, Hasman H, Holden MTG, Hopkins KL, Iredell J, Kahlmeter G, Köser CU,  
548 MacGowan A, Mevius D, Mulvey M, Naas T, Peto T, Rolain JM, Samuelsen Ø,  
549 Woodford N. 2017. The role of whole genome sequencing in antimicrobial  
550 susceptibility testing of bacteria: report from the EUCAST Subcommittee. *Clin*  
551 *Microbiol Infect* **23**:2–22. [10.1016/j.cmi.2016.11.012](https://doi.org/10.1016/j.cmi.2016.11.012)
- 552 22. Meehan CJ, Goig GA, Kohl TA, Verboven L, Dippenaar A, Ezewudo M, Farhat MR,  
553 Guthrie JL, Laukens K, Miotto P, Ofori-Anyinam B, Dreyer V, Supply P, Suresh A,  
554 Utpatel C, van Soolingen D, Zhou Y, Ashton PM, Brites D, Cabibbe AM, de Jong  
555 BC, de Vos M, Menardo F, Gagneux S, Gao Q, Heupink TH, Liu Q, Loiseau C,  
556 Rigouts L, Rodwell TC, Tagliani E, Walker TM, Warren RM, Zhao Y, Zignol M,  
557 Schito M, Gardy J, Cirillo DM, Niemann S, Comas I, Van Rie A. 2019. Whole  
558 genome sequencing of *Mycobacterium tuberculosis*: current standards and open  
559 issues. *Nat Rev Microbiol* **17**:533-545. doi: [10.1038/s41579-019-0214-5](https://doi.org/10.1038/s41579-019-0214-5)
- 560 23. Andries K, Verhasselt P, Guillemont J, Göhlmann HW, Neefs JM, Winkler H, Van  
561 Gestel J, Timmerman P, Zhu M, Lee E, Williams P, de Chaffoy D, Huitric E, Hoffner  
562 S, Cambau E, Truffot-Pernot C, Lounis N, Jarlier V. 2005. A diarylquinoline drug  
563 active on the ATP synthase of *Mycobacterium tuberculosis*. *Science* **307**:223-227.  
564 doi: [10.1126/science.1106753](https://doi.org/10.1126/science.1106753)
- 565 24. Andries K, Vilellas C, Coeck N, Thys K, Gevers T, Vranckx L, Lounis N, de Jong  
566 BC, Koul A. 2014. Acquired resistance of *Mycobacterium tuberculosis* to  
567 bedaquiline. *PLoS One* **9**:e102135. doi: [10.1371/journal.pone.0102135](https://doi.org/10.1371/journal.pone.0102135)

- 568 25. Almeida D, Ioerger T, Tyagi S, Li SY, Mdluli K, Andries K, Grosset J, Sacchettini J,  
569 Nuermberger E. 2016. Mutations in pepQ Confer Low-level Resistance to  
570 Bedaquiline and Clofazimine in *Mycobacterium tuberculosis*. *Antimicrob Agents*  
571 *Chemother* **60**:4590-4599. doi: [10.1128/AAC.00753-16](https://doi.org/10.1128/AAC.00753-16)
- 572 26. Haver HL, Chua A, Ghode P, Lakshminarayana SB, Singhal A, Mathema B,  
573 Wintjens R, Bifani P. 2015. Mutations in genes for the F420 biosynthetic pathway  
574 and a nitroreductase enzyme are the primary resistance determinants in  
575 spontaneous in vitro-selected PA-824-resistant mutants of *Mycobacterium*  
576 *tuberculosis*. *Antimicrob Agents Chemother* **59**:5316-5323. doi:  
577 [10.1128/AAC.00308-15](https://doi.org/10.1128/AAC.00308-15)
- 578 27. Matsumoto M, Hashizume H, Tomishige T, Kawasaki M, Tsubouchi H, Sasaki H,  
579 Shimokawa Y, Komatsu M. 2006. OPC-67683, a nitro-dihydro-imidazo-oxazole  
580 derivative with promising action against tuberculosis in vitro and in mice. *PLoS Med*  
581 **3**:e466 doi: [10.1371/journal.pmed.0030466](https://doi.org/10.1371/journal.pmed.0030466)
- 582 28. Zignol M, Cabibbe AM, Dean AS, Glaziou P, Alikhanova N, Ama C, Andres S,  
583 Barbova A, Borbe-Reyes A, Chin DP, Cirillo DM, Colvin C, Dadu A, Dreyer A,  
584 Driesen M, Gilpin C, Hasan R, Hasan Z, Hoffner S, Hussain A, Ismail N, Kamal  
585 SMM, Khanzada FM, Kimerling M, Kohl TA, Mansjö M, Miotto P, Mukadi YD, Mvusi  
586 L, Niemann S, Omar SV, Rigouts L, Schito M, Sela I, Seyfaddinova M, Skenders G,  
587 Skrahina A, Tahseen S, Wells WA, Zhurilo A, Weyer K, Floyd K, Raviglione MC.  
588 2018. Genetic sequencing for surveillance of drug resistance in tuberculosis in  
589 highly endemic countries: a multi-country population-based surveillance study.  
590 *Lancet Infect Dis* **18**:675-683. doi: [10.1016/S1473-3099\(18\)30073-2](https://doi.org/10.1016/S1473-3099(18)30073-2)
- 591 29. Kohl TA, Utpatel C, Schleusener V, De Filippo MR, Beckert P, Cirillo DM, Niemann  
592 S. 2018. MTBseq: a comprehensive pipeline for whole genome sequence analysis



- 593 of *Mycobacterium tuberculosis* complex isolates. *PeerJ* **6**:e5895. doi:  
594 [10.7717/peerj.5895](https://doi.org/10.7717/peerj.5895)
- 595 30. Lew JM, Kapopoulou A, Jones LM, Cole ST. 2011. TubercuList--10 years  
596 after. *Tuberculosis (Edinb)* **91**:1-7. doi: [10.1016/j.tube.2010.09.008](https://doi.org/10.1016/j.tube.2010.09.008)
- 597 31. Meehan CJ, Moris P, Kohl TA, Pečerska J, Akter S, Merker M, Utpatel C, Beckert  
598 P, Gehre F, Lempens P, Stadler T, Kaswa MK, Kühnert D, Niemann S, de Jong BC.  
599 2018. The relationship between transmission time and clustering methods in  
600 *Mycobacterium tuberculosis* epidemiology. *EBioMedicine* **37**:410-416.  
601 doi: [10.1016/j.ebiom.2018.10.013](https://doi.org/10.1016/j.ebiom.2018.10.013)
- 602 32. Lopez B, Siqueira de Oliveira R, Pinhata JMW, Chimara E, Pacheco Ascencio E,  
603 Puyén Guerra ZM, Wainmayer I, Simboli N, Del Granado M, Palomino JC, Ritacco  
604 V, Martin A. 2019. Bedaquiline and linezolid MIC distributions and epidemiological  
605 cut-off values for *Mycobacterium tuberculosis* in the Latin American region. *J*  
606 *Antimicrob Chemother* **74**:373-379. doi: [10.1093/jac/dky414](https://doi.org/10.1093/jac/dky414)
- 607 33. Palomino JC, Martin A, Camacho M, Guerra H, Swings J, Portaels F. 2002.  
608 Resazurin microtiter assay plate: simple and inexpensive method for detection of  
609 drug resistance in *Mycobacterium tuberculosis*. *Antimicrob Agents Chemother*  
610 **46**:2720-2722. doi: [10.1128/aac.46.8.2720-2722.2002](https://doi.org/10.1128/aac.46.8.2720-2722.2002)
- 611 34. World Health Organization. 2018. Technical Report on critical concentrations for  
612 drug susceptibility testing of medicines used in the treatment of drug-resistant  
613 tuberculosis. WHO, Geneva. [WHO/CDS/TB/2018.5](https://www.who.int/publications/i/item/WHO-CDS-TB-2018.5)
- 614 35. Bashiri G, Squire CJ, Moreland NJ, Baker EN. 2008. Crystal structures of F420-  
615 dependent glucose-6-phosphate dehydrogenase FGD1 involved in the activation of  
616 the anti-tuberculosis drug candidate PA-824 reveal the basis of coenzyme and  
617 substrate binding. *J Biol Chem* **283**:17531-17541. doi: [10.1074/jbc.M801854200](https://doi.org/10.1074/jbc.M801854200)

- 618 36. Cellitti SE, Shaffer J, Jones DH, Mukherjee T, Gurumurthy M, Bursulaya B, Boshoff  
619 HI, Choi I, Nayyar A, Lee YS, Cherian J, Niyomrattanakit P, Dick T, Manjunatha UH,  
620 Barry CE 3rd, Spraggon G, Geierstanger BH. 2012. Structure of Ddn, the  
621 deazaflavin-dependent nitroreductase from *Mycobacterium tuberculosis* involved in  
622 bioreductive activation of PA-824. *Structure* **20**:101-112. doi:  
623 [10.1016/j.str.2011.11.001](https://doi.org/10.1016/j.str.2011.11.001)
- 624 37. Radhakrishnan A, Kumar N, Wright CC, Chou TH, Tringides ML, Bolla JR, Lei HT,  
625 Rajashankar KR, Su CC, Purdy GE, Yu EW. 2014. Crystal structure of the  
626 transcriptional regulator Rv0678 of *Mycobacterium tuberculosis*. *J Biol Chem*  
627 **289**:16526-16540. doi: <https://doi.org/10.1074/jbc.M113.538959>
- 628 38. Yin S, Ding F, Dokholyan NV. 2007 Eris: an automated estimator of protein stability.  
629 *Nat Methods* **4**:466-467. doi: [10.1038/nmeth0607-466](https://doi.org/10.1038/nmeth0607-466)
- 630 39. Laimer J, Hofer H, Fritz M, Wegenkittl S, Lackner P. 2015. MAESTRO - multi agent  
631 stability prediction upon point mutations. *BMC Bioinformatics* **16**:116.  
632 doi: [10.1186/s12859-015-0548-6](https://doi.org/10.1186/s12859-015-0548-6)
- 633 40. Neudert G, Klebe G. 2011. DSX: a knowledge-based scoring function for the  
634 assessment of protein-ligand complexes. *J Chem Inf Model* **51**:2731-2745. doi:  
635 [10.1021/ci200274g](https://doi.org/10.1021/ci200274g)
- 636 41. Miller BR 3rd, McGee TD Jr, Swails JM, Homeyer N, Gohlke H, Roitberg AE. 2012  
637 MMPBSA.py: An Efficient Program for End-State Free Energy Calculations. *J Chem*  
638 *Theory Comput* **8**:3314–3321. doi: [10.1021/ct300418h](https://doi.org/10.1021/ct300418h)
- 639 42. Larkin MA, Blackshields G, Brown NP, Chenna R, McGettigan PA, McWilliam H,  
640 Valentin F, Wallace IM, Wilm A, Lopez R, Thompson JD, Gibson TJ, Higgins DG.  
641 2007. Clustal W and Clustal X version 2.0. *Bioinformatics* **23**:2947–2948.  
642 doi: [10.1093/bioinformatics/btm404](https://doi.org/10.1093/bioinformatics/btm404)

- 643 43. The PyMOL Molecular Graphics System, Version 2.0 Schrödinger, LLC.
- 644 44. Migliori GB, Pontali E, Sotgiu G, Centis R, D'Ambrosio L, Tiberi S, Tadolini M,  
645 Esposito S. 2017. Combined Use of Delamanid and Bedaquiline to Treat Multidrug-  
646 Resistant and Extensively Drug-Resistant Tuberculosis: A Systematic Review. *Int J*  
647 *Mol Sci* **18**:341. doi: [10.3390/ijms18020341](https://doi.org/10.3390/ijms18020341)
- 648 45. Ferlazzo G, Mohr E, Laxmeshwar C, Hewison C, Hughes J, Jonckheere S,  
649 Khachatryan N, De Avezedo V, Egazaryan L, Shroufi A, Kalon S, Cox H, Furin J,  
650 Isaakidis P. 2018. Early safety and efficacy of the combination of bedaquiline and  
651 delamanid for the treatment of patients with drug-resistant tuberculosis in Armenia,  
652 India, and South Africa: a retrospective cohort study. *Lancet Infect Dis* **18**:536–544.  
653 doi: [10.1016/S1473-3099\(18\)30100-2](https://doi.org/10.1016/S1473-3099(18)30100-2)
- 654 46. Li Y, Sun F, Zhang W. 2019. Bedaquiline and delamanid in the treatment of  
655 multidrug-resistant tuberculosis: Promising but challenging. *Drug Dev Res* **80**:98-  
656 105. doi: [10.1002/ddr.21498](https://doi.org/10.1002/ddr.21498)
- 657 47. Olayanju O, Esmail A, Limberis J, Dheda K. 2020. A regimen containing  
658 bedaquiline and delamanid compared to bedaquiline in patients with drug-resistant  
659 tuberculosis. *Eur Respir J* **55**:1901181. doi: [10.1183/13993003.01181-2019](https://doi.org/10.1183/13993003.01181-2019)
- 660 48. World Health Organization. 2016. The Use of Delamanid in the Treatment of  
661 Multidrug-Resistant Tuberculosis in Children and Adolescents: Interim Policy  
662 Guidance. WHO, Geneva. [WHO/HTM/TB/2016.14](https://www.who.int/publications/i/item/WHO-HTM/TB/2016.14)
- 663 49. Achar J, Hewison C, Cavalheiro AP, Skrahina A, Cajazeiro J, Nargiza P, Herboczek  
664 K, Rajabov AS, Hughes J, Ferlazzo G, Seddon JA, du Cros P. 2017. Off-Label Use  
665 of Bedaquiline in Children and Adolescents with Multidrug-Resistant Tuberculosis.  
666 *Emerg Infect Dis* **23**:1711–1713. doi: DOI: [10.3201/eid2310.170303](https://doi.org/10.3201/eid2310.170303)

- 667 50. Rancoita PMV, Cugnata F, Gibertoni Cruz AL, Borroni E, Hoosdally SJ, Walker TM,  
668 Grazian C, Davies TJ, Peto TEA, Crook DW, Fowler PW, Cirillo DM, CRyPTIC  
669 Consortium. 2018. Validating a 14-Drug Microtiter Plate Containing Bedaquiline and  
670 Delamanid for Large-Scale Research Susceptibility Testing of *Mycobacterium*  
671 *tuberculosis*. *Antimicrob Agents Chemother* **62**:e00344-18. doi:  
672 [0.1128/AAC.00344-18](https://doi.org/10.1128/AAC.00344-18)
- 673 51. Kaniga K, Aono A, Borroni E, Cirillo DM, Desmaretz C, Hasan R, Joseph L, Mitarai  
674 S, Shakoor S, Torrea G, Ismail NA, Omar SV. 2020. Validation of Bedaquiline  
675 Phenotypic Drug Susceptibility Testing Methods and Breakpoints: a Multilaboratory,  
676 Multicountry Study. *J Clin Microbiol* **58**:e01677-19. doi: [10.1128/JCM.01677-19](https://doi.org/10.1128/JCM.01677-19)
- 677 52. Köser CU, Maurer FP, Kranzer K. 2019. 'Those who cannot remember the past are  
678 condemned to repeat it': Drug-susceptibility testing for bedaquiline and delamanid.  
679 *Int J Infect Dis* **80**:32-35. doi: [0.1016/j.ijid.2019.02.027](https://doi.org/10.1016/j.ijid.2019.02.027)
- 680 53. Cabibbe AM, Walker TM, Niemann S, Cirillo DM. 2018 Whole genome sequencing  
681 of *Mycobacterium tuberculosis*. *Eur Respir J* **52**:1801163. doi:  
682 [10.1183/13993003.01163-2018](https://doi.org/10.1183/13993003.01163-2018)
- 683 54. Veziris N, Bernard C, Guglielmetti L, Le Du D, Marigot-Outtandy D, Jaspard M,  
684 Caumes E, Lerat I, Rioux C, Yazdanpanah Y, Tiotiu A, Lemaitre N, Brossier F,  
685 Jarlier V, Robert J, Sougakoff W, Aubry A; CNR MyRMA and the Tuberculosis  
686 Consilium of the CNR MyRMA; CNR MyRMA and Tuberculosis Consilium of the  
687 CNR MyRMA. 2017. Rapid emergence of *Mycobacterium tuberculosis* bedaquiline  
688 resistance: lessons to avoid repeating past errors. *Eur Respir J* **49**:1601719. doi:  
689 [10.1183/13993003.01719-2016](https://doi.org/10.1183/13993003.01719-2016)
- 690 55. Miotto P, Cabibbe AM, Feuerriegel S, Casali N, Drobniewski F, Rodionova Y,  
691 Bakonyte D, Stakenas P, Pimkina E, Augustynowicz-Kopeć E, Degano M, Ambrosi

692 A, Hoffner S, Mansjö M, Werngren J, Rüsç-Gerdes S, Niemann S, Cirillo DM.  
693 2014. *Mycobacterium tuberculosis* pyrazinamide resistance determinants: a  
694 multicenter study. *mBio* 5:e01819-14. doi: [10.1128/mBio.01819-14](https://doi.org/10.1128/mBio.01819-14)

## 695 Legends

696 **Table 1. List of *Rv0678* mutations detected in MTBc strains resistant to BDQ.** In the  
697 table are reported all the information for each BDQ-resistant related mutations (MIC  $\geq$  0.25  
698  $\mu\text{g/ml}$ ) and for the MTBc isolate tested for BDQ susceptibility. <sup>a</sup> Genomic position in  
699 reference H37Rv NC\_000962.3 strain; <sup>b</sup> Amino acid (aa) change and nucleotide (nt)  
700 change; <sup>c</sup> Minimum Inhibitory concentration (MIC) value in  $\mu\text{g/ml}$ . <sup>d</sup> Country of MTBc  
701 isolate origin: Pakistan (PAK), Bangladesh (BGD). <sup>e</sup> TB patient treatment history: new TB  
702 case “New”, or patient with previous TB history and treatment “Retreatment”. <sup>f</sup> Drug  
703 resistance pattern of the isolates: MDR (multi drug resistant strain), FQs  
704 (fluoroquinolones), INH (Isoniazid), RIF (Rifampicin), R/S (resistant/susceptible).

705 **Fig. 1. Amino acid sequence alignment of BDQ-susceptible frameshift mutations in**  
706 ***Rv0678*.** The amino acid (aa) sequence of the translated proteins with Ile16fs and  
707 Ala153fs frameshift mutations (associated to BDQ-susceptible MIC) were aligned with  
708 *Rv0678* wild type aa sequence using ClustalX. In both cases the two insertions mutations  
709 cause the addition of new aa residues without altering the frame of *Rv0678* protein and  
710 functional residues of the protein.

711 **Fig. 2. Cartoon representation of *Rv0678* protein structures with mutations**  
712 **associated to BDQ-resistant and to BDQ-susceptible phenotypes.** Carton  
713 representation of the monomer present in the X-Ray unit cell (4NB5). Highlighted in sticks  
714 are reported the mutations associated to BDQ resistance (red) and susceptible (green)  
715 from BDQ MIC assay. *In silico* predicted mutations which could alter dimerization or DNA  
716 binding function, and predicted associated to BDQ-susceptible phenotype are shown in

717 orange and in blue respectively. Cartoon zoomed representations of Rv0678 dimerization  
718 domain and DNA binding domain are reported.

719 **Fig. 3. Lineage and country distributions of MTBc strains with variants in *Rv0678*,**  
720 ***atpE* and *pepQ* genomic regions.** The graph reports all mutations found in *Rv0678*, *atpE*  
721 and *pepQ* genomic regions showing their distribution among lineages and country of  
722 isolation. The histograms refer to the number of strains in which mutations were observed  
723 (Y axis). The colors of the histograms represent the different countries of isolation while  
724 the patterns inside each bar represent the different lineages. On the X axis, the results of  
725 the MIC test for available MTBc strains are also reported: red triangle are BDQ-resistant  
726 strains (MIC > 0.25 µg/ml); yellow box, are BDQ low resistance level strains, (MIC = 0.25  
727 µg/ml); green triangles are BDQ-susceptible strains (MIC ≤ 0.12 µg/ml).

728 **Table 2. List of *ddn*, *fgd1*, *fbiA*, *fbiB* and *fbiC* mutations detected in MTBc strains**  
729 **resistant to DLM.** In the table are reported all the information for each DLM-resistant  
730 related mutations (MIC ≥ 0.12) and for the MTBc isolates tested for DLM susceptibility. <sup>a</sup>  
731 Genomic position in reference H37Rv NC\_000962.3 strain. <sup>b</sup> Amino acid change and  
732 nucleotide (nt) change; <sup>c</sup> minimum Inhibitory concentration (MIC) value in µg/ml. <sup>d</sup> Country  
733 of MTBc isolate origin: Pakistan (PAK), Bangladesh (BGD), Ukraine (UKR), Azerbaijan  
734 (AZE), South Africa (SA). <sup>e</sup> Patient treatment history; new TB case “New”, or patient with  
735 previous TB history and treatment “Retreatment”. <sup>f</sup> Drug resistance pattern of the isolates:  
736 MDR (multi drug resistant strain), FQs (fluoroquinolones), INH (Isoniazid), RIF  
737 (Rifampicin), R/S (resistant/susceptible).

738 **Fig. 4. Cartoon representation Ddn and Fgd1 protein structures with mutations**  
739 **found associated to DLM-resistant or associated to DLM-susceptible phenotype. A:**  
740 Ddn protein bound to F420 cofactor (3R5R) with highlighted in sticks the resistant (red),  
741 susceptible (green), *in silico* DLM-resistant associated mutations (orange) and *in silico*

742 predicted DLM-susceptible mutations (blue). F420 is shown in magenta licorice. A zoom  
743 cartoon representation of Ddn bound to F420 is reported. The hydrogen bond network  
744 Thr140-Ala82-Lys79-F420-H2 is shown in dashed yellow line and the Ala82 and Lys79  
745 residues are shown in sticks. **B**: Fgd1 carton representation of holo- and homodimer-Fgd1  
746 bound to F420 (3B4Y). Helices involved in protein dimerization are colored in cyan.  
747 Highlighted in sticks the DLM-resistant (red), DLM-susceptible (green), *in silico* predicted  
748 DLM-resistant mutations (orange) and *in silico* predicted DLM-susceptible mutations  
749 (blue).

750 **Fig. 5. Lineage and country distributions of MTBc strains with variants in *ddn* and**  
751 ***fgd1* genomic regions and *fbiA-fbiB* operon region.** The graph reports all mutations  
752 found in *ddn*, *fgd1* (**A**) and *fbiA*, *fbiB* (**B**) genomic regions, showing their distribution among  
753 lineages and country of isolation. The histograms refer to the number of strains in which  
754 mutations were observed (Y axis). The colors of the histograms represent the different  
755 countries of isolation while the patterns inside each bar represent the different lineages.  
756 On the X axis, the results of the MIC test for available MTBc strains are also reported: red  
757 triangle are DLM-resistant strains (MIC  $\geq$  0.12  $\mu\text{g/ml}$ ); yellow box are low resistance level  
758 (MIC = 0.12  $\mu\text{g/ml}$ ) and green triangles are DLM-susceptible strains (MIC < 0.12  $\mu\text{g/ml}$ ). If  
759 a mutation was previously described in literature it was also reported (“S” for strain  
760 susceptible to DLM or “R” for strain resistant to DLM).

761 **Fig. 6. Lineage and country distributions of MTBc strains with variants in *fbiC***  
762 **genomic region.** In this graph are report all mutations found in *fbiC* genomic region  
763 showing their distribution among lineages and countries of isolation. See Fig. 5 legend for  
764 details.

765 **Table S1. *M. tuberculosis* genomic regions considered for bedaquiline and**  
766 **delamanid resistances.**

767 <sup>a</sup> For promoter regions, it was considered the upstream region up to the -100 position  
768 before the first nucleotide of each gene.

769 <sup>b</sup> The genomic positions are based on the reference genome of *M. tuberculosis* H37Rv  
770 NC\_000962.3.

771 **Fig. S1. Study design, number of selected *M. tuberculosis* (MTBc) isolates and DST**  
772 **profile categorization. A:** phenotypic drug susceptibility test (pDST) of the whole  
773 collection which classified MTBc isolates in not-MDR, MDR and XDR strains. **B:** Flow chart  
774 scheme of isolates selection and stratifications. The blue scheme refers to MTBc isolates  
775 selected for DLM-related mutations while the red once to MTBc isolates selected for BDQ-  
776 related mutations. <sup>a</sup> The WHO approved study list includes 4795 whole genome  
777 sequencing (WGS) samples (accession number SRP128089). <sup>b</sup> Stratification by the  
778 phenotypic resistance profile for the selected isolates. Abbreviations: **not-MDR**, fully  
779 susceptible strains (full-S), mono resistant to rifampicin (RIF) or to isoniazid (INH); **MDR**,  
780 multidrug resistant strains, resistant almost to INH and RIF; **INH-R**, resistant to isoniazid;  
781 **RIF-R**, resistant to rifampicin; **FQ-R**, resistant to fluoroquinolones; **Fully-S**: susceptible to  
782 INH and RIF; **Pre-XDR**, MDR resistant also to FQ or second line injectables; **XDR**, MDR  
783 plus resistance to FQs and second-line injectables.

784 **Dataset S1. Samples general database.**

785 General database with all information of selected MTBc strains harbouring at least one  
786 mutation pattern in candidate genes for BDQ and DLM resistance. The excel database is  
787 divided in two sheets named “mutations list for BDQ” and “mutations list for DLM”. <sup>a</sup> WGS  
788 analysis (genomic regions for BDQ/DLM resistance) in which are report the list of  
789 mutations from WGS analysis with information of genomic locus, gene ID, genomic  
790 coordinate (reference strain H37Rv NC\_000962.3), amino acid substitution and type of  
791 mutation. <sup>b</sup> MIC value results (µg/mL) from REMA assay (DLM/BDQ) of selected isolates



792 (for several mutations two different isolates were tested); empty cell means that the strain  
793 with that specific mutation was not available. <sup>c</sup> Previously reported mutations: If a mutation  
794 was previously reported it is indicated if linked or not to resistance phenotype. <sup>e</sup>  
795 Information on selected samples (isolates 1 and 2): WGS sample name in the WHO  
796 database, country of origin, lineage (coll. lineage) and DST profile of MTBc isolates  
797 selected for MIC test. <sup>d</sup> Lineage/Country mutation frequency distribution: numbers of MTBc  
798 isolates carrying mutations among countries of origin and strain lineage.

#### 799 **Dataset S2. Mutation structural analysis.**

800 General database with all results from the *in silico* analysis of point mutations for the  
801 available crystal structures of proteins: Ddn (PDB 3R5R), Fgd1 (PDB 3B4Y) and Rv0678  
802 (PDB 4NB5). Free energy calculation ( $\Delta\Delta G$  kcal/mol) of all amino acid change mutations  
803 were performed with Eris, an automated estimator of protein stability and MAESTRO, an  
804 approach for multi agent stability prediction upon point mutations. DrugScore (DSX)  
805 software, a Knowledge-Based Scoring Function for the Assessment of Protein–Ligand  
806 Complexes, was used for Ddn-F420 and Fgd1-F420 complexes analysis. The calculation  
807 of mutations effect on Rv0678 dimer stability was performed using MMPBSA.py program  
808 within Amber14 suite. See materials and methods for details.

809 **Figure S2. Heatmap of SNP based cluster analysis by distance matrix.** The figure  
810 shows the SNP-based cluster analysis results of six MTBc strains groups harbouring the  
811 most frequent DLM-resistant related mutations. Colour scale in the square refers to the  
812 number of SNPs between each strain (12 SNPs threshold is reported from white to blue).  
813 The max number of SNPs are set to 15. MTBc lineages information is also reported.

814 **Text S1. Supplementary material and methods.** Supplementary information about  
815 protocols used for REMA and *in silico* analyses.

816

817 **Tables:**

818 **Table 1.**

| <i>Gene locus</i>    | <i>Genomic coordinate</i> <sup>a</sup> | <i>Mutation (SNPs and Indels)</i> <sup>b</sup> | <i>BDQ MIC (µg/mL)</i> <sup>c</sup> | <i>Country</i> <sup>d</sup> | <i>Lineage (coll. lineage)</i> | <i>Treatment history</i> <sup>e</sup> | <i>DR pattern</i> <sup>f</sup> |
|----------------------|----------------------------------------|------------------------------------------------|-------------------------------------|-----------------------------|--------------------------------|---------------------------------------|--------------------------------|
| <i>Rv0678</i>        | 779005                                 | Gly6fs (Del_16-17 gg)                          | 0.5                                 | PAK                         | Delhi-CAS (3)                  | New                                   | MDR, FQ-R                      |
| <i>Rv0678-Rv0678</i> | 779016<br>779263                       | Gln9fs (Ins_27 c)<br>Tyr92fs (Ins_274 a)       | 0.5                                 | PAK                         | EAI (1,1,2)                    | Retreatment                           | MDR                            |
| <i>Rv0678</i>        | 779275                                 | Arg96Trp (cgg/Tgg)                             | 0.25                                | BGD                         | Delhi-CAS (3)                  | Retreatment                           | RIF, INH S                     |
| <i>Rv0678</i>        | 779321                                 | Met111Lys (tag/aAg)                            | 0.25                                | BGD                         | Haarlem (4,1,2,1)              | New                                   | RIF, INH S                     |

819

820 **Table 2.**

| <i>Gene locus</i> | <i>Genomic coordinate</i> <sup>a</sup> | <i>Mutation (SNPs and Indels)</i> <sup>b</sup> | <i>DLM MIC (µg/mL)</i> <sup>c</sup> | <i>Country</i> <sup>d</sup> | <i>Lineage (coll. Lineage)</i> | <i>Treatment history</i> <sup>e</sup> | <i>DR pattern</i> <sup>f</sup> |
|-------------------|----------------------------------------|------------------------------------------------|-------------------------------------|-----------------------------|--------------------------------|---------------------------------------|--------------------------------|
| <i>ddn</i>        | 3986846                                | Met1fs (Del_2 t)                               | 2                                   | BGD                         | Eur-Amer.(4,1,2)               | New                                   | RIF, INH S                     |
| <i>ddn</i>        | 3986848                                | Pro2Gln (ccg/cAg)                              | 0.25                                | AZE                         | mainly-T (4,8)                 | New                                   | RIF, INH S                     |
| <i>ddn</i>        | 3986885                                | Ser14fs (Del_41 g)                             | > 4                                 | BGD                         | Beijing (2,2,1)                | Retreatment                           | MDR                            |
| <i>ddn-fbiA</i>   | 3986923<br>3640445                     | Trp27Stop (tgg/tAg)<br>prom (g-18a)            | > 4                                 | BGD                         | EAI (1,1,3)                    | Retreatment                           | MDR                            |
| <i>ddn</i>        | 3986932                                | Arg30His (cgc/cAc)                             | 1                                   | BGD                         | EAI (1,1,3)                    | Retreatment                           | RIF, INH S                     |
| <i>ddn</i>        | 3986944                                | Gly34Glu (ggg/gAg)                             | 0.12                                | AZE                         | LAM (4,3,3)                    | New                                   | RIF, INH S                     |
| <i>ddn</i>        | 3987015                                | Gln58Stop (cag/Tag)                            | > 4                                 | UKR                         | Beijing (2,2,1)                | Retreatment                           | MDR, FQ-R                      |
| <i>ddn-fbiA</i>   | 3987025<br>3641164                     | Val61Gly (gtc/gGc)<br>Ile208Val (atc/Gtc)      | 0.12                                | SA                          | Eur-Amer.(4,1,2)               | New                                   | RIF, INH S                     |
| <i>ddn-fbiA</i>   | 3987115<br>3640714                     | Asn91Thr (aac/aCc)<br>Val58Ile (gtc/Atc)       | 0.25                                | AZE                         | mainly-T (4,8)                 | New                                   | RIF, INH S                     |
| <i>ddn</i>        | 3987262                                | Thr140Ile (acc/aTc)                            | 0.5                                 | BGD                         | S-type (4,4,1,1)               | New                                   | RIF, INH S                     |
| <i>fgd1</i>       | 491723                                 | Gly314Glu (gga/gAa)                            | 0.12                                | BGD                         | Beijing (2,2,1)                | New                                   | RIF, INH S                     |
| <i>fbiA</i>       | 3640546                                | Lys2Glu (aag/Gag)                              | 0.12                                | AZE                         | Beijing (2,2,1)                | Retreatment                           | RIF, INH S                     |
| <i>fbiA</i>       | 3641002                                | Val154Ile (gta/Ata)                            | 0.12                                | BGD                         | Beijing (2,2,1)                | Retreatment                           | MDR, FQ-R                      |
| <i>fbiA-fbiB</i>  | 3641018<br>3642877                     | Pro159Gln (ccg/cAg)<br>Lys448Arg (aag/aGg)     | 0.12                                | BGD                         | Delhi-CAS (3)                  | Retreatment                           | RIF, INH S                     |
| <i>fbiA</i>       | 3641164                                | Ile208Val (atc/Gtc)                            | 0.25                                | BGD                         | Eur-Amer.(4,1,2)               | New                                   | RIF, INH S                     |
| <i>fbiA</i>       | 3641167                                | Ile209Val (atc/Gtc)                            | 0.5                                 | BGD                         | Eur-Amer.(4,5)                 | New                                   | RIF, INH S                     |
| <i>fbiA</i>       | 3641403                                | Cys287Stop (tgc/tgA)                           | 4                                   | PAK                         | EAI (1,1,2)                    | New                                   | RIF, INH S                     |
| <i>fbiA</i>       | 3641453                                | Arg304Gln (cgg/cAg)                            | 0.25                                | PAK                         | Delhi-CAS (3)                  | New                                   | MDR                            |
| <i>fbiB</i>       | 3642195                                | Gly221Ser (ggc/Agc)                            | 0.12                                | BGD                         | Beijing (2,2,2)                | New                                   | FQ-R                           |
| <i>fbiB</i>       | 3642204                                | Asp224Asn (gac/Aac)                            | 0.5                                 | BGD                         | Delhi-CAS (3)                  | New                                   | RIF, INH S                     |
| <i>fbiB</i>       | 3642351                                | Gly273Arg (ggc/Cgc)                            | 0.25                                | BGD                         | X-Type (4,1,1,3)               | New                                   | RIF, INH S                     |

|                       |                    |                                             |      |     |                      |             |                  |
|-----------------------|--------------------|---------------------------------------------|------|-----|----------------------|-------------|------------------|
| <b>fbiC</b>           | 1303241            | Tyr104Cys (tat/tGt)                         | 0.5  | AZE | Beijing (2,2,1)      | Retreatment | RIF, INH S       |
| <b>fbiC</b>           | 1303265            | Gly112Ala (ggc/gCc)                         | 0.12 | BGD | EAI (1,1,3)          | New         | RIF, INH S       |
| <b>fbiC</b>           | 1303612            | Leu228Phe (ctc/Ttc)                         | 0.12 | BGD | EAI (1,1,3)          | New         | RIF, INH S       |
| <b>fbiC-<br/>fbiB</b> | 1303769<br>3642223 | Ser280Leu (tcg/tTg)<br>Arg230Gln (cgg/cAg)  | 0.12 | BGD | EAI (1,1,3)          | New         | RIF, INH S       |
| <b>fbiC</b>           | 1304498            | Pro523Leu (cct/cTt)                         | 0.5  | BGD | EAI (1,1,3)          | New         | RIF, INH S       |
| <b>fbiC</b>           | 1305101            | Asn724Ser (aac/aGc)                         | 0.25 | BGD | Beijing (2,2,1)      | New         | RIF, INH S       |
| <b>fbiC</b>           | 1305215            | Ser762Asn (agc/aAc)                         | 0.12 | BGD | Delhi-CAS (3)        | Retreatment | RIF, INH S; FQ-R |
| <b>fbiC</b>           | 1305434            | Ala835Val (gcg/gTg)                         | 0.5  | BGD | EAI (1,1,3)          | New         | INH R            |
| <b>fbiC</b>           | 1305494            | Ala855fs (Del 62 nt)                        | 0.5  | SA  | Haarlem<br>(4,1,2,1) | New         | RIF, INH S       |
| <b>fbiC-<br/>fbiB</b> | 1305494<br>3642874 | Ala855fs (Del 62 nt)<br>Leu447Arg (ctg/cGg) | 0.25 | SA  | mainly-T (4,8)       | Retreatment | MDR              |
| <b>fbiC</b>           | 1305496            | Ala856Pro (gcc/Ccc)                         | 0.25 | BGD | EAI (1,1,3)          | New         | RIF, INH S       |

821

822

823

824 **Table S1**

|                          | <i>locus name</i> <sup>a</sup> | <i>genomic region</i> <sup>b</sup> |
|--------------------------|--------------------------------|------------------------------------|
| <b>Delamanid (DLM)</b>   | <i>fbiA_ups</i>                | [3640142-3640542]                  |
|                          | <i>fbiA (Rv3261)</i>           | [3640543-3641538]                  |
|                          | <i>fbiB (Rv3262)</i>           | [3641535-3642881]                  |
|                          | <i>fbiC_ups</i>                | [1302682-1302930]                  |
|                          | <i>fbiC (Rv1173)</i>           | [1302931-1305501]                  |
|                          | <i>fgd1_ups</i>                | [490683-490782]                    |
|                          | <i>fgd1 (Rv0407)</i>           | [490783-491793]                    |
|                          | <i>ddn_ups</i>                 | [3986744-3986843]                  |
|                          | <i>ddn (Rv3547)</i>            | [3986844-3987299]                  |
| <b>Bedaquiline (BDQ)</b> | <i>atpE_ups</i>                | [1460997-1461044]                  |
|                          | <i>atpE (Rv1305)</i>           | [1461045-1461290]                  |
|                          | <i>Rv0678_ups</i>              | [778890-778989]                    |
|                          | <i>Rv0678</i>                  | [778990-779487]                    |
|                          | <i>pepQ_ups</i>                | [2860419-2860518]                  |
|                          | <i>pepQ (Rv2535)</i>           | [2859300-2860418]                  |

825

```

*****
Rv0678      VSVNDGVDQMGAEPDIMEF----VEQMGGYFESRSLTRLAGRLLGWLLVCDPEROSSEELATALAASSGGISTNARMLIQ 76
Rv0678_Ile16fs VSVNDGVDQMGAEPDIMEFVMEFVEQMGGYFESRSLTRLAGRLLGWLLVCDPEROSSEELATALAASSGGISTNARMLIQ 80
Rv0678_Alal53fs VSVNDGVDQMGAEPDIMEF----VEQMGGYFESRSLTRLAGRLLGWLLVCDPEROSSEELATALAASSGGISTNARMLIQ 76
1.....10.....20.....30.....40.....50.....60.....70.....80

```

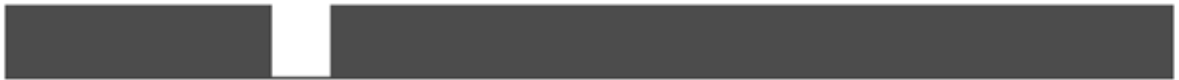

```

***** *
Rv0678      FGFIERLAVAGDRRTYFRLRPNAFAAGERERIRAMAEQLDLADVGLRALGDAPPQRSRRLREMRDLLAYMENVVSDALG- 155
Rv0678_Ile16fs FGFIERLAVAGDRRTYFRLRPNAFAAGERERIRAMAEQLDLADVGLRALGDAPPQRSRRLREMRDLLAYMENVVSDALG- 159
Rv0678_Alal53fs FGFIERLAVAGDRRTYFRLRPNAFAAGERERIRAMAEQLDLADVGLRALGDAPPQRSRRLREMRDLLAYMENVVSDRPGA 156
.....90.....100.....110.....120.....130.....140.....150.....160

```

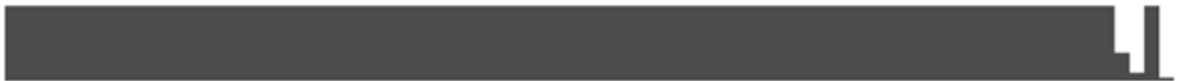

```

: : * * :
Rv0678      -RYSQRTG--EDD--- 165
Rv0678_Ile16fs -RYSQRTG--EDD--- 169
Rv0678_Alal53fs IQPANRRGRLLMSNLAI 172
.....170.....

```

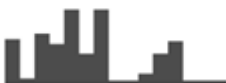

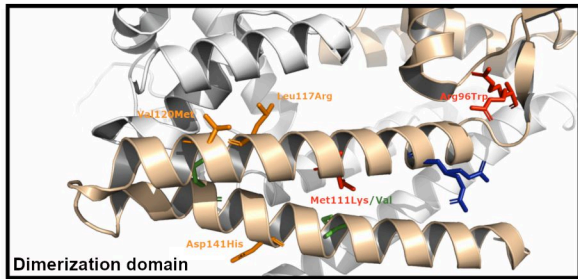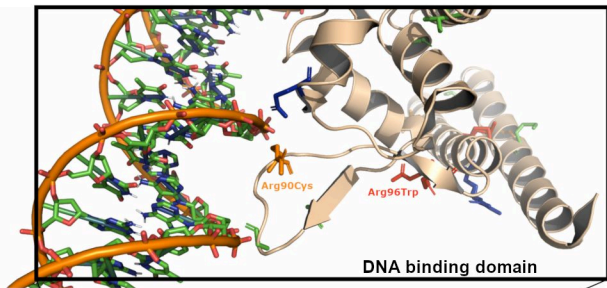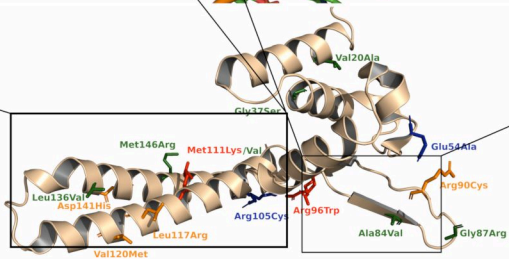

**N. of MTBc isolates**

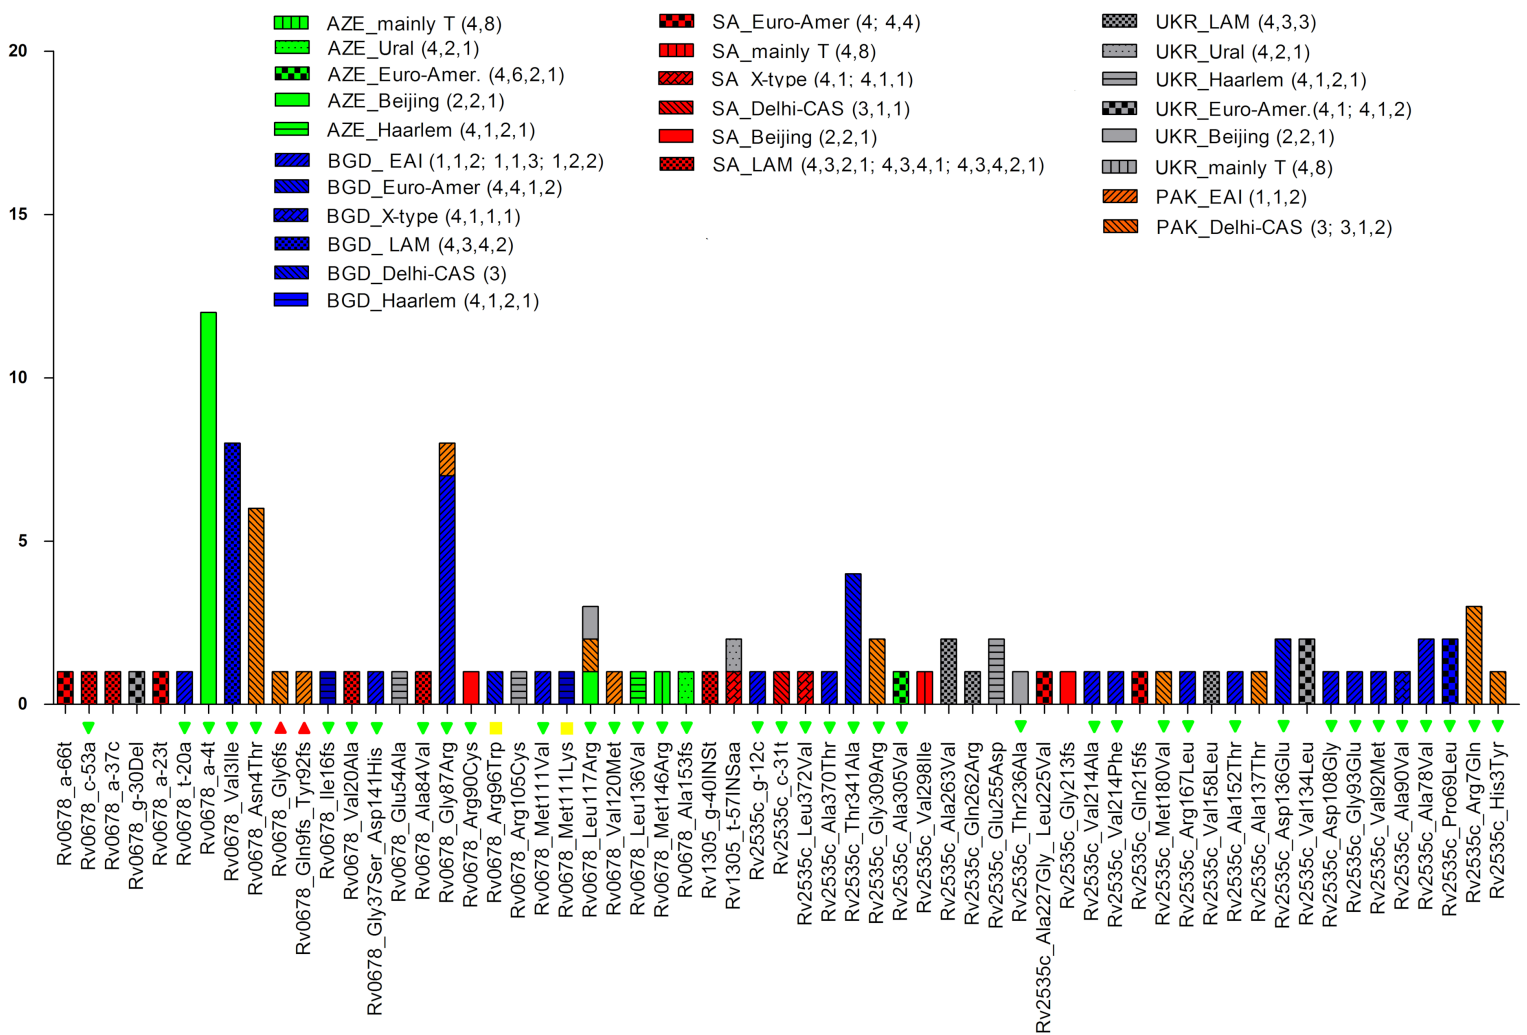

A

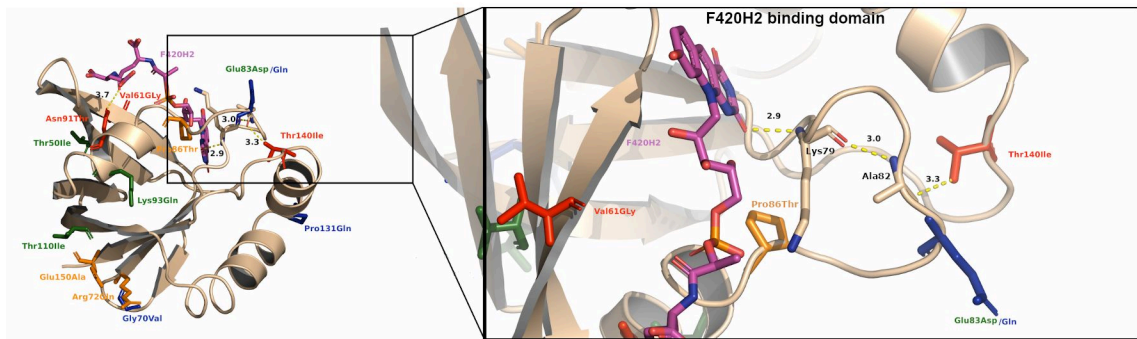

B

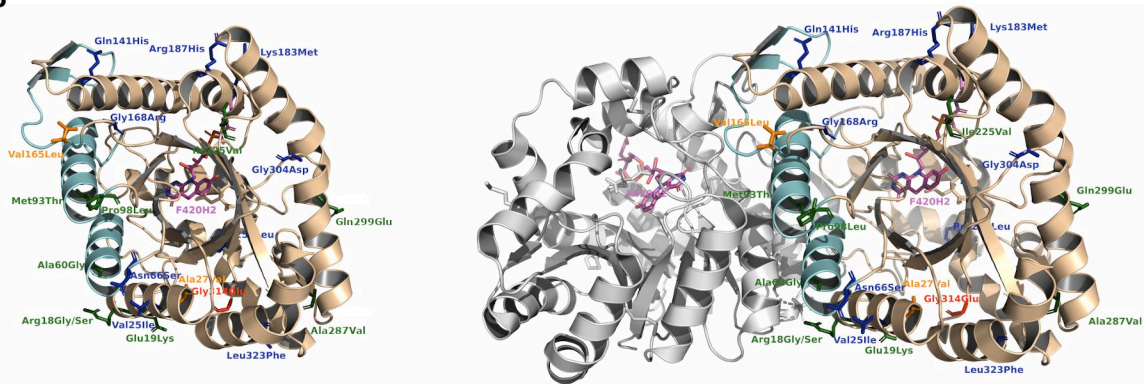

**A****N. of MTBc isolates**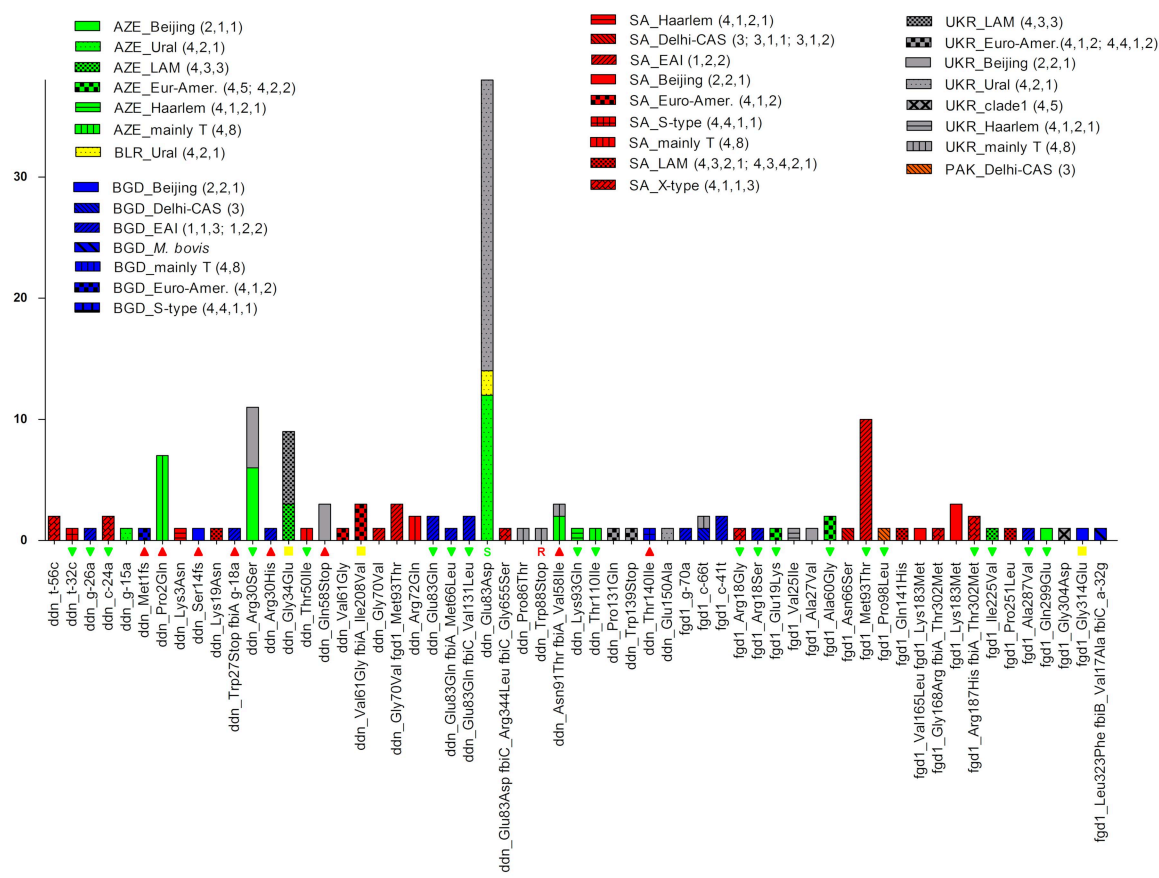**B****N. of MTBc isolates**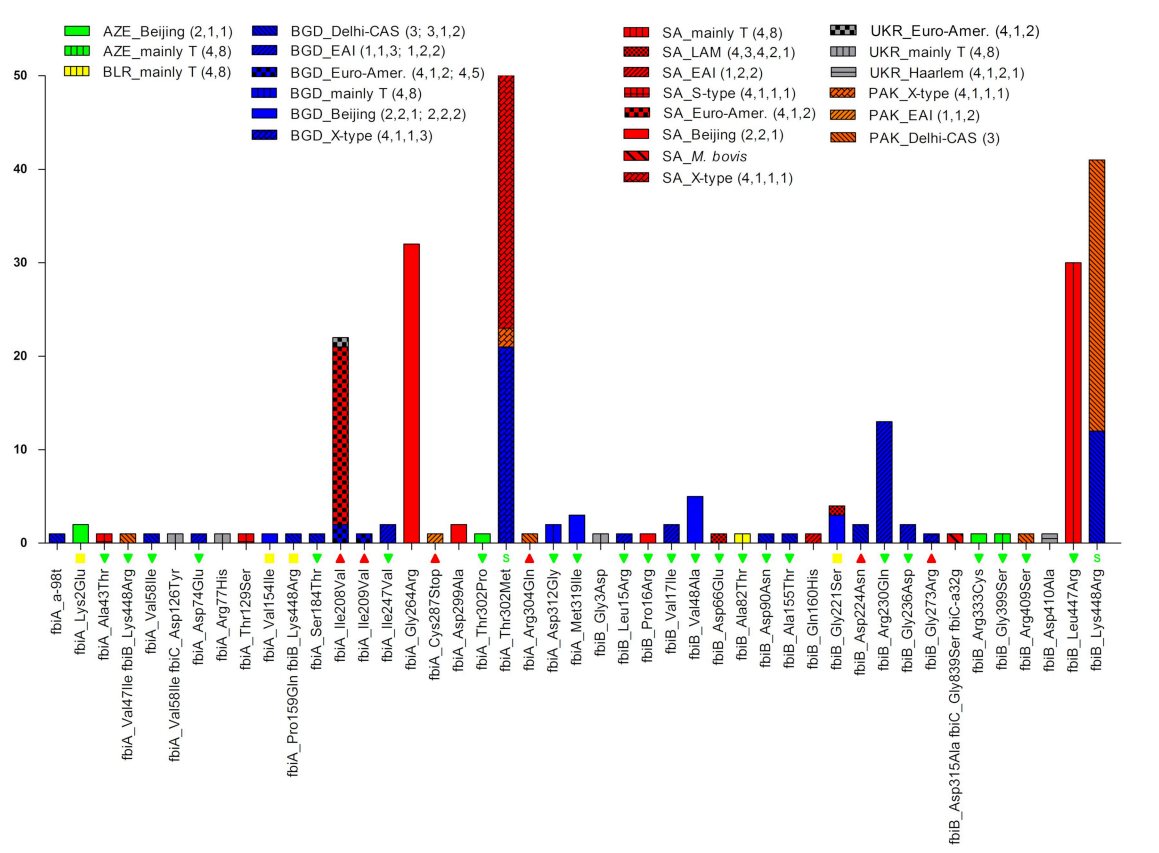



# N. of MTBc isolates

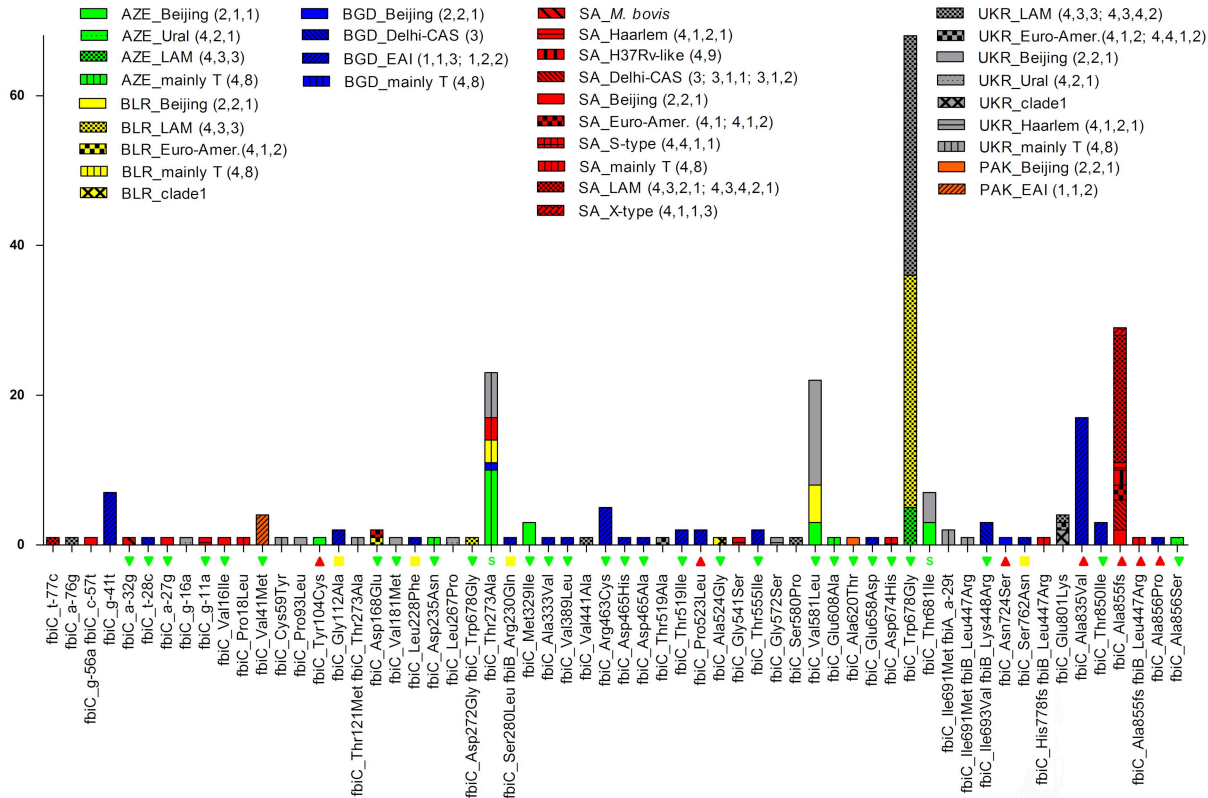

Source: http://biorxiv.org/content/10.1101/2020.05.27.120451v1.full.pdf
